# Geographical distribution and the impact of socio-environmental indicators on incidence of Mpox in Ontario, Canada

Chigozie Louisa J. Ugwu<sup>1</sup>, Ali Asgary<sup>4,7</sup>, Jianhong Wu<sup>1</sup>, Jude Dzevela Kong<sup>4,5,6</sup>, Nicola Luigi Bragazzi<sup>1,2,3</sup>, James Orbinski<sup>4,8</sup>, Woldegebriel Assefa Woldegerima<sup>\*1</sup>

<sup>1</sup>Laboratory for Industrial and Applied Mathematics (LIAM), Department of Mathematics and Statistics, York University, Toronto, ON, Canada,

<sup>2</sup>Department of Health Sciences (DISSAL), Postgraduate School of Public Health, University of Genoa, Genoa, Italy,

<sup>3</sup>United Nations Educational, Scientific and Cultural Organization (UNESCO) Chair, Health Anthropology Biosphere and Healing Systems, University of Genoa, Genoa, Italy,

<sup>4</sup>Africa-Canada Artificial Intelligence and Data Innovation Consortium (ACADIC),

<sup>5</sup>Artificial Intelligence & Mathematical Modeling Lab (AIMM Lab), Dalla Lana School of Public Health, University of Toronto,

<sup>6</sup>Global South Artificial Intelligence for Pandemic and Epidemic Preparedness and Response Network (AI4PEP)

<sup>7</sup>The Advanced Disaster, Emergency and Rapid Response Program, York University, Toronto, Canada,

<sup>8</sup>The Dahdaleh Institute for Global Health Research, York University, Toronto, Canada

## \* Correspondence:

Corresponding Author

[wassefaw@yorku.ca](mailto:wassefaw@yorku.ca)

## Abstract

36  
37  
38  
39  
40  
41  
42  
43  
44  
45  
46  
47  
48  
49  
50  
51  
52  
53  
54  
55  
56  
57  
58  
59  
60  
61  
62  
63  
64  
65  
66  
67  
68  
69  
70  
71  
72  
73  
74  
75  
76  
77  
78

**Background:** Ontario, being one of Canada's largest provinces, has been central to the high incidence of human Mpox. Research is scarce on how socio-environmental factors influence Mpox incidences. This study seeks to explore potential geographical correlations and the relationship between indicators of social marginalization and Mpox incidence rate in Ontario.

**Methodology:** We used surveillance data on confirmed human Mpox cases from May 1, 2022, to March 31, 2024, extracted from the Public Health Ontario website for this study. Spatial autocorrelation of Mpox incidence was investigated using spatial methods including Moran's Index, Getis-Ord  $G_i^*$  statistic, and spatial scan statistic. Following this, we adopted a generalized Poisson regression (GPR) model to estimate the incidence rate ratios (IRRs) based on the association between Ontario PHU-level marginalization and Mpox incidence, while adjusting for age and sex. The goodness-of-fit of the models was assessed using the Akaike Information Criterion (AIC), Akaike's Information Criterion corrected (AICc), and the Bayesian Information Criterion (BIC).

**Results:** Spatial scan statistics, LISA, and Getis-Ord  $G_i^*$  statistics revealed similar results for PHUs with the highest rates of Mpox in Ontario. Our study detected statistically significantly higher Mpox cases in Toronto, Ottawa, Peterborough, Kingston, Peel, Wellington-Dufferin-Guelph, Middlesex-London, Halton region, Brant County, Hamilton, and Haldimand-Norfolk PHUs ( $p - value < 0.05$ ). Higher rates of Mpox infection in Ontario were associated with ethnic concentration (racialized, migrants or visible minority) ( $RR = 9.478$ ; 95%  $CI = 1.621 - 2.876$ ), and male gender ( $RR = 5.150$ ; 95%  $CI = 1.159 - 2.119$ ) and residential instability ( $RR = 14.112$ ; 95%  $CI = 1.887, 3.407$ ).

**Conclusion:** We identified major Mpox hotspots in Toronto. According to our model results, the high incidence rate may be influenced by the greater population of internal migrant population and younger individuals. Based on these insights, we recommend targeted interventions in the high-risk neighborhoods. Efforts to improve Mpox diagnosis and promote health equity among socioeconomically vulnerable populations, including racial and ethnic minorities, should be implemented.

**Keywords:** Ontario, Mpox, Spatial autocorrelation, Hotspots, Risk Factors, Generalized Poisson regression

## Introduction

80 In July 2022, the World Health Organization (WHO) declared the Mpox disease to be a pandemic due to  
81 its sporadic spread to non-endemic regions (1, 2). The global public health, social security, and the economy have  
82 been challenged by the Mpox outbreak in non-endemic areas, including Canada (1). In September 2023, the virus  
83 had infected over 90,000 people worldwide, and 117 countries had reported cases of deaths associated with the  
84 Mpox. Recent epidemiological studies from non-endemic countries have highlighted large differences in the  
85 incidence of Mpox in the context of geographical locations, population, and socio-environmental factors (3-6).

86 In Canada, the Mpox burden is unevenly distributed geographically across provinces and within provinces,  
87 while the highest number of cases were witnessed in Ontario (2, 7). As of September 31, 2023, there were a total  
88 of 1515 human Mpox cases in Canada and 770 human Mpox cases in Ontario alone, with no fatalities (1, 8).

89 Although vaccination and public health measures have been successful in reducing the spread of Mpox in  
90 Canada, the province of Ontario still observed an increase in Mpox occurrence from mid-January to the end of  
91 March 2024 with a total of 32 confirmed human Mpox cases, despite the decline across the country (9, 10). The  
92 new occurrence of Mpox cases suggest a possible disproportionate burden of confirmed human Mpox cases in  
93 Ontario in relation to socio-environmental and behavioral determinants (11).

94 In Canada, there is limited research on the role of social and demographic factors that may influence both  
95 the incidence and within province spread of Mpox (2, 9). This is an important area of study considering prior  
96 work conducted in Ontario in the context of similar diseases like Covid-19, where researchers found that people  
97 that are marginalized had increased risk of COVID-19 morbidity and mortality as compared to the general  
98 population in Ontario (12-14). This may demonstrate possible lack of health service equity (15).

99 It is epidemiologically recognized that socioeconomic status, marginalization, and inequity are significant  
100 risk factors for morbidity and mortality from various diseases (16, 17). Research has shown that a person's socio-  
101 economic position, which includes factors like education, occupation, and income, can have a significant impact  
102 on their overall health (6). Typically, individuals with a lower socio-economic status are more susceptible to

103 health issues and disease infection, hence, contributing to health inequities that impact individuals across all levels  
104 of society (1, 18).

105 In Ontario, the largest province in Canada, and most demographically diverse province in the country,  
106 vulnerability to disease infection could be influenced by the level of marginalization of the PHUs or neighborhood  
107 in which individuals live (19, 20). Although there is prior research on health equity and other diseases such as  
108 COVID-19 in the context of marginalization, there has not been any study on the role of social factors in the risk  
109 of contracting Mpox in Ontario.

110 Much work has been done in other non-endemic countries like the USA, European countries and in Brazil,  
111 with less literature in Canada (21, 22). Research evidence in other countries has shown that marginalized groups  
112 of individuals are more likely to be vulnerable to Mpox infection (6, 23, 24). Apart from sexually diverse groups,  
113 ethnic minorities and socioeconomically disadvantaged (material deprived) individuals may have  
114 disproportionately suffered socio-determinants of health, with disproportionate resource distribution, societal  
115 exclusion, and different life experiences having well-documented implications for health status and well-being  
116 (19). Understanding the epidemiological context, geographical distribution, and influence of socio-environmental  
117 indicators in Mpox incidence at PHU level in Ontario can be an effective strategy for planning public health  
118 policies and targeting priority areas.

119 Given the availability of the 2021 Ontario marginalized index data (25, 26), this study aims to examine  
120 the geographical distribution and the role of PHU-level marginalization indicators on the incidence of Mpox cases  
121 in Ontario, while adjusting for age and gender. We hypothesize that (1) Mpox infection rates are randomly  
122 distributed among the PHUs in Ontario (values of the features i.e. Mpox incidence rates throughout Ontario are  
123 spatially uncorrelated) and (2) PHUs with higher population density and greater levels of marginalization are  
124 likely to experience an increased incidence of Mpox. This study could guide resource allocation, including testing,  
125 vaccination strategies, and other disease control interventions, to Public Health Units (PHUs) at higher risk of  
126 Mpox.

## Materials and methods

### Study area and data

The study region, as shown in **Fig 1**, is the province of Ontario in Canada, which is partitioned into 34 units called Ontario Public Health Units (PHUs). Ontario is a highly populated province in the east-central part of Canada. Ontario has an estimated population of 14.2 million, a land area of 892,411.8  $km^2$  with a population density of 16 inhabitants/ $km^2$  (27). Approximately 34% of the population are visible minorities, and about 44% are immigrants born outside Canada (28).

The PHUs, which were formed by grouping several urban and rural municipalities, are the smallest geographical units considered for this study (28). Algoma (2226), Northwestern (2249), Thunder Bay District (2262), Sudbury and District (2261), and the Timiskaming PHUs are situated in Northern Ontario, while the remaining 29 PHUs make up Central, Toronto, Southern and Eastern Ontario Health Unit Regions (28).

**Figure 1. Geographic location of the study area. Ontario is in east-central Canada and the country's second-largest province by land area in  $km^2$ .**

### Mpox epidemiological data

We obtained data on confirmed human Mpox cases in Ontario from May 1, 2022, to March 31, 2024, from the Integrated Public Health Information System (iPHIS) of Public Health Ontario (PHO), which records cases of reportable Mpox disease across Ontario and publish as surveillance report (9, 10). Between May 1, 2022, and July 2023, Ontario reported a total of 722 confirmed Mpox cases, with no deaths associated with the disease (11). Notably, there was a resurgence in Mpox cases beginning in mid-January 2024, with 32 confirmed cases

153 reported by the end of March 2024, slightly fewer than the 33 cases recorded throughout 2023 (9). Overall, our  
154 study included a total of 758 Mpox cases across Ontario's PHUs. We utilized the 34 PHUs ( $n = 34$ ), as the  
155 spatial unit of analysis. All Mpox cases were geographically linked to the corresponding PHU using boundary  
156 polygons in ArcGIS Pro (29). These PHU-level polygons (geographical shapefiles) were sourced from the  
157 publicly accessible Statistics Canada Geodatabase (28, 30).

## 159 **Population and socio-demographic data**

160

161 Based on existing studies and data availability, our explanatory variables included a variety of socioeconomic,  
162 and demographic factors initially retrieved at PHU level from the 2021 Statistics Canada population census data  
163 (30, 31). Apart from the population density, age distribution and gender, these variables included: (1) percentage  
164 of the population aged 15–64 years with a lower level of education (not having a university certificate, diploma  
165 or a bachelor degree), (2) prevalence of low income (living in a low-income household based on based on the  
166 Low-income measure, after tax (LIM-AT), table representing the poverty line), (3) unemployment rate  
167 (population over 15 years and unemployed), (4) percentage of immigrants (individuals who were born outside of  
168 Canada), and (5) average household size.

169 However, we found that the listed variables from 1 to 5 are subset variables used to construct the 2021 Ontario  
170 Marginalized index (ON-Marg) factors, a widely used index that encompass various factors of socioeconomic  
171 and marginalization status at Ontario PHU level (25, 26). The 2021 ON-Marg Index was created through principal  
172 component analysis from the 2021 Canadian census data, jointly by researchers at MAP Centre for Urban Health  
173 Solutions at St. Michael's Hospital and Public Health Ontario (25).

174 These are four dimensions (subdomains) of marginalization as measured by the 2021 ON-Marg for each PHU  
175 in Ontario and have been used extensively across Ontario for research purposes on health and disease disparities,  
176 advocacy work, population health assessment and surveillance, and public health program planning and resource

177 allocation (25, 32). Therefore, as described in **Table 1**, this study extracted the 2021 ON-Marg index (26), for  
178 each PHU in Ontario, derived using principal component factor analysis of 42 indicators from the 2021 Census  
179 of Population (33, 34). Additionally, the four-dimensional ON-Marg factors have been demonstrated to be linked  
180 to many health outcomes and preferred for use in this research to overcome the issue of multicollinearity, and to  
181 demonstrate its potential to measure health inequalities in the context of Mpox incidences in Ontario.

182 These dimensional factors (**Table 1**) included: material resources (previously called ‘material deprivation’),  
183 households and dwellings (previously called ‘residential instability’), age and labour force (previously called  
184 ‘dependency’) and racialized and newcomer populations (previously called ‘ethnic concentration’) or Percentage  
185 of visible minorities, have been associated with many health outcomes (25, 26).

186 According to the Employment Equity Act, visible minorities are "persons, other than Aboriginal peoples, who  
187 are non-Caucasian in race or non-white in colour". We also adjusted for demographic factors such as gender, and  
188 population density, and age distributions by PHU extracted from the 2021 Canadian census (31). Population  
189 density was measured as the number of persons per square kilometer, and it was found to be highly skewed to the  
190 right and therefore, a log-transformation was applied.

191 Datasets were linked to the geographic boundary files, sourced from Statistics Canada and Ontario Open Data  
192 (31), using the PHU-ID in Arc GIS Pro. (29)

193

194 **Table 1: Explanatory variables.**

| Variable                                 | Description                                                                                                                                                                                                                                                                                                                                                                                                                                                                                                                                                                                                                                                                                                 |
|------------------------------------------|-------------------------------------------------------------------------------------------------------------------------------------------------------------------------------------------------------------------------------------------------------------------------------------------------------------------------------------------------------------------------------------------------------------------------------------------------------------------------------------------------------------------------------------------------------------------------------------------------------------------------------------------------------------------------------------------------------------|
| <b>Material resources or deprivation</b> | The ON-Marg dimension of material deprivation is closely <b>connected to poverty (low socio-economic status)</b> and analytically factored from the 2021 population census data using these indicators:<br><ol style="list-style-type: none"><li>(1) Proportion of the population aged 15 years + without a high-school diploma (low level of education).</li><li>(2) Proportion of families who are lone parent families.</li><li>(3) Proportion of the population aged 15 years+ who are unemployed.</li><li>(4) proportion of the population considered low-income households (prevalence of low-income), and</li><li>(5) Proportion of households living in dwellings that need major repair.</li></ol> |

|                                                                                                                       |                                                                                                                                                                                                                                                                                |
|-----------------------------------------------------------------------------------------------------------------------|--------------------------------------------------------------------------------------------------------------------------------------------------------------------------------------------------------------------------------------------------------------------------------|
| <b>Population density</b>                                                                                             | Percentage of people residing in each PHU per km/square (measurement of population per unit land area for each PHU).                                                                                                                                                           |
| <b>Household dwelling (residential instability)</b>                                                                   | Composite measure of:<br>(1) Proportion of population living alone.<br>(2) Average number of individuals per household (dwelling)<br>(3) Proportion of the population aged 15+<br>(4) Proportion of population who are single, divorced, or widowed.                           |
| <b>Racialized and newcomer populations (ethnic concentration or visible minority)</b>                                 | Composite measure of:<br>(1) Proportion of population whoa are recent immigrants (within 5 years), and<br>(2) Proportion of the population who self-identified as a visible minority (as defined by Statistics Canada), they are and/or non-white, non-Indigenous populations. |
| <b>Age and labour force (dependency)</b>                                                                              | Composite measure of:<br>(1) Proportion of the population who are 65+<br>(2) Proportion of population not participating in labour force (aged 15+)<br>(3) Dependency ratio (total population aged 0 to 14 and 65+ over the total population aged 15 to 65 years.               |
| <b>Gender</b>                                                                                                         | The proportion of males aged 15+ of the total population of males and females residing in each PHU.                                                                                                                                                                            |
| <b>Percentage age 0-14 year</b>                                                                                       | Age groups of the population at each PHU from 0-14 years                                                                                                                                                                                                                       |
| <b>Percentage age 15-64 year</b>                                                                                      | Age groups of the population at each PHU from 15-64 years                                                                                                                                                                                                                      |
| <b>Percentage age 65year and over</b>                                                                                 | Age groups of the population at each PHU from 64 years and over.                                                                                                                                                                                                               |
| <b>Average household size</b>                                                                                         | The average number of persons per household.                                                                                                                                                                                                                                   |
| <b>Married or common law partner</b>                                                                                  | Proportion of married or common law partners who set up their household together in one dwelling.                                                                                                                                                                              |
| <b>For each dimension, scores were treated as a continuous variable from lower to higher level of marginalization</b> |                                                                                                                                                                                                                                                                                |

195

## 196 Ethical considerations

197 The current study utilized publicly available Mpox data; therefore, ethical approval is not required. The data is  
 198 available online at: <https://www.publichealthontario.ca/>

199



## Measurement of a dependent variable

The Mpox incident rate per 100,000 population for the years 2022-2023 was used as the dependent variable. To calculate this rate, we employed the 2021 census population data to ascertain the population at risk of Mpox for each PHU in Ontario, using the formula:

$$(MIR/100K)_{PHUs(x)} = \left( \frac{\text{Total number of Mpox confirmed cases}_{PHUs(x)}}{\text{Total population of each PHUs}_{(x)}} \right) \times 100,000$$

Subsequently, the Mpox incidence rate per 100 000 population for each PHU and the explanatory variables were linked to the PHU polygon in the ArcGIS Pro version 3.0.36056 for further analysis (35).

## Analytical methods

### Global spatial autocorrelation analysis of Mpox incidence rate

This study first applied spatial autocorrelation to determine whether Mpox cases are correlated geographically. Spatial autocorrelation, as determined by Global Moran's Index (36), acts as the indicator for analyzing Mpox geographical distribution throughout Ontario. Spatial autocorrelation is closely related to Tobler's first law of geography, which states that "everything is connected to everything else, but objects at proximity are more strongly interconnected than those farther apart." (37). A Global Moran's Index statistics equal to zero (0) shows the absence of spatial correlation, indicating a random distribution of Mpox, and no clustered PHUs across Ontario. A Global Moran's Index  $> 0$ , indicates the presence of positive spatial autocorrelation, and when the value approaches +1, it signifies a strong positive spatial autocorrelation, indicating that the PHUs are clustered.

In this study, we evaluated the spatial autocorrelation of the Mpox incidence rate throughout Ontario using the global Moran's I, and the interpretation of the result was considered in the context of its null hypothesis of spatial randomness (36). The null hypothesis specifies that the Mpox incidence are randomly distributed among the PHUs within Ontario. A *p* - value resulting from the Global Moran's I test below the 5% significance level

223 indicates the presence of spatial autocorrelation of Mpox among the PHUs across Ontario. Let ,  $x_i$  and  $x_j$  denote  
224 observed Mpox cases at PHUs  $i$  and  $j$ ,  $i, j = 1, \dots, n = 34$ . Then the global Moran's I statistic (36), is defined as:

225

226

$$I = \frac{N \sum_{i=1}^n \sum_{j=1}^n w_{i,j} (x_i - \bar{y})(x_j - \bar{X})}{(\sum_{i=1}^n \sum_{j=1}^n w_{i,j}) \sum_{i=1}^n (x_i - \bar{X})} \quad i \neq j, \quad (1)$$

227

228 where  $N$  is the total number of Mpox cases,  $n$  is number of PHUs,  $W_{i,j}$  denote the spatial weights between PHU  
229  $i$  and PHU  $j$ ;  $\bar{X}$  represents the mean value of Mpox cases across the entire PHU and it is given by  $\bar{X} = \frac{\sum_i x_i}{n}$ ,  $x_i$   
230 and  $x_j$  denote the number of Mpox cases in PHU  $i$  and  $j$ , respectively, . The corresponding values of  $z$  -score  
231 and  $p$  - value of Moran's I statistic are used to reject or accept the null hypothesis of spatial randomness of  
232 Mpox distribution across the entire PHUs in Ontario. For this study, we employed a fixed distance band spatial  
233 matrix for the autocorrelation (Global Moran's I) analysis.

234

## Local indicators of spatial autocorrelation

235

### Local Moran's I statistic

236

237 The major limitation of Global Moran's I statistic is that it only generates a single summary statistic for the entire  
238 study area, meaning that it only measures spatial autocorrelation (clustering) at the global scale (38). Global  
239 Moran's I does not detect where local clusters or spatial outliers are located (39). Therefore, we applied the local  
240 Moran's I statistic (LISA) introduced by (39), to investigate the local level of spatial clustering of PHUs with a  
241 high and low incidence of Mpox (38). The computation of local Moran's I assesses the local version of Global  
242 Moran's I for each PHU, computes scores that reveal the underlying significant spatial clustering and local spatial  
243 outliers within the data at each PHU to determine variation in spatial autocorrelation over Ontario. Its significance  
244 is evaluated in five categories namely: High-High, High-Low, Low-High, Low-Low, and non-significant Mpox

245 incidence rates (40). LISA effectively pinpoints PHUs where Mpox incidences are significantly notable, offering  
246 insights into potential underlying mechanisms [39]. It calculates a local Moran's I value, a z-score, a pseudo p-  
247 value, and a code representing the cluster type for each statistically significant PHU. The z-scores and pseudo p-  
248 values indicate the statistical significance of the computed Local Moran's I values (39), at  $p - value < 0.01$ .

249 Let  $x_i$  be the  $i$ th Mpox observation at the  $i$ th PHU, then, the local Moran's I statistic (41) of spatial association  
250 is calculated using the following formula:

$$251 \quad I_i = \frac{x_i - \bar{X}}{S_i^2} \sum_{i=1, i \neq j}^n w_{i,j} (x_i - \bar{X}) \quad (2)$$

252  
253 where  $x_i$  is the Mpox incidence rate in the  $i$ th PHU;  $w_{i,j}$  is the spatial weight matrix that defines spatial interaction  
254 between PHU  $i$  and  $j$ ;  $n$  is the total number of PHUs,  $\bar{X}$  is the mean and  $S_i^2 = \frac{\sum_{i=1, i \neq j}^n (x_i - \bar{X})^2}{n-1}$  is the deviation of  
255 neighbouring PHUs (39). This study employed the K-nearest neighbors' approach to establish a spatial weight  
256 matrix, wherein the spatial autocorrelation relationship was defined with 33 neighboring Public Health Units  
257 (PHUs) for each specific PHU (41). We used ArcGIS Pro (ESRI, Redlands, CA, USA) (35), LISA analysis. The  
258 statistical significance level was set at 0.05, and we used 9999 permutations in the simulation to assess the  
259 sensitivity of our results (41).

## 260 **Getis-Ord local Gi\* statistic**

261

262 As alternative to local Moran's I inferential statistic, local Getis-Ord Gi\* statistic was applied to pinpoint more  
263 local level statistically significant Mpox hotspots, cold spots and relative magnitude in each PHU (42). While a  
264 PHU with a high Mpox count is noteworthy, it may not necessarily be a statistically significant hotspot. Unlike  
265 the local Moran's I, the Getis-Ord Gi\* statistic value computed in each PHU is expressed as z-score value, which  
266 allows a direct interpretation for statistical significant of the PHU (42). The Getis- Ord Gi\* statistic is computed  
267 using the following formula:

268

269

$$G_i^* = \frac{\sum_{j=1}^n w_{i,j}x_i - \bar{X} \sum_{j=1}^n w_{i,j}}{s \sqrt{\frac{n \sum_{j=1}^n w_{i,j}^2 - (\sum_{j=1}^n w_{i,j})^2}{n-1}}} \quad (3)$$

270

271 where  $x_i$  is the Mpox count at  $i$ th PHU,  $w_{i,j}$  is the spatial weight between  $i$ th and  $j$ th PHU,  $n$  denote the number  
272 of PHUs,  $\bar{X}$  is the mean and  $s$  is the standard deviation. We used ArcGIS Pro (ESRI, Redlands, CA, USA) (35),  
273 the Getis-Ord  $G_i^*$  statistic, setting the number of permutation tests at 9999 for sensitivity analysis and a 0.05 level  
274 of significance. The K-nearest neighbors' approach was utilized, with contiguity set at 34 PHUs for a polygon  
275 contiguity spatial weight matrix. This matrix was created based on the 34 PHUs that share common boundaries  
276 and vertices. (41).

277

## 278 Spatial scan statistics

279 We utilized a spatial scan statistic (43), with a discrete Poisson probability model to evaluate the spatial  
280 distribution of Mpox incidence in Ontario, as LISA and Getis-Ord  $G_i^*$  statistics only consider neighboring Public  
281 Health Units (PHUs). This analysis aimed to identify statistically significant spatial clusters of Mpox, both high  
282 and low, for comparison with Mpox hotspots identified by the Getis-Ord  $G_i^*$  statistic (44). Unlike the LISA and  
283 Getis-Ord  $G_i^*$  statistics, the retrospective purely spatial scan Poisson model detects most likely high clusters  
284 accurately because it fits the assumption that the number of Mpox cases in each PHU was Poisson distributed  
285 according to a known underlying population at the risk of Mpox.

286 The analysis employed a circular moving window centered on each PHU, with a maximum spatial cluster  
287 size based on the population at risk of Mpox. The window moved until reaching the maximum population at risk,  
288 with the radius of each circle continuously increasing to a maximum radius. The maximum likelihood function  
289 was used to maximize the circular window size, identifying the primary cluster as the circular window with the

highest likelihood ratio (44). Additional non-overlapping clusters in circular windows with high likelihood ratios were identified as secondary clusters. Each circular window was tested using a Monte Carlo simulation to assess the null hypothesis of spatial randomness. SaTScan version 10.1.3 was used for this analysis, with a maximum window size of 50% of the population at risk (45). To ensure statistical power, 999 Monte Carlo replications were performed, considering only clusters at a 99% confidence interval as statistically significant.

## Non-spatial statistical analysis

Descriptive statistics and bivariate association between Mpox outcomes and explanatory variables were explored. To test for global spatial dependency, we calculated the Global Moran's I, and no statistically significant spatial autocorrelation was detected with the Global Moran's Index. Thus, we proceeded with the multivariate Poisson analysis without accounting for spatial correlation (46). The final model choice was guided by the Akaike Information Criterion (AIC), Akaike's Information Criterion corrected (AICc), and the Bayesian Information Criterion (BIC) (47).

We considered using the Poisson Regression (PR) model as the initial statistical model in the count families of generalized linear models (GLM) to model our data (48). Let  $Y_i$  be the Mpox count variable in the  $i^{th}$  PHU,  $i = 1, 2, \dots, 34$ . If  $Y_i \sim$  a Poisson distribution, the probability density function is expressed mathematically as:

$$f(X_i) = \frac{e^{-\mu_i} \mu_i^{y_i}}{y_i!}, \quad y_i = 0, 1, \dots \quad (4)$$

The Poisson model assumes that the mean equals the variance,  $E(X_i) = Var(X_i) = \mu_i = \exp(\exp(X_i\beta))$ . To integrate a covariate into Equation (4) while ensuring non-negativity, the mean is presumed to be multiplicative, such that:  $E(X_i) = \mu_i = \varphi_i \exp(\exp(X_i\beta))$ , where  $\varphi_i$  is a measure of disease exposure,  $X_i$  is a  $p \times 1$  vector of predictor variables (socioenvironmental variables), and  $\beta$  is a  $p \times 1$  vector of unknown regression coefficients.

313 The regression coefficients ( $\beta$ ) are estimated via the maximum likelihood approach by maximizing the log-  
314 likelihood function. The Poisson log-likelihood is given as:

$$315 \quad L(\beta) = \sum_{i=1}^n (y_i X_i \beta - \mu_i - \log(y_i!)) \quad (5)$$

316 Even though the standard PR model has advantages, it also has potential drawbacks. The application of  
317 the standard PR model often encounters violations of the assumptions of independence and excessive variance  
318 (i.e. Over dispersion, fitted variance being larger than the mean), which requires model adjustment (49). The  
319 problem of adjusting for overdispersion in the standard PR model is that it leads to inflated test statistics, biased  
320 standard errors, and inconsistent conclusions of estimates. The presence of over-dispersion can be assessed by  
321 comparing the deviance  $D = \sum_{i=1}^n \left\{ y_i \ln \left( \frac{y_i}{\hat{\mu}_i} \right) - (y_i - \hat{\mu}_i) \right\}$ , with the degree of freedom (48).

322  
323 Corresponding to the outcomes being over dispersed count data, a generalized Poisson regression model  
324 (GPR) was chosen as a flexible extension to the standard Poisson regression model (50). The GPR model  
325 proposed by (51), accommodates both over-dispersion, under-dispersion and cluster heterogeneity inherent in a  
326 data (52). The GPR has a probability density function is given as (51):

$$327 \quad f(y_i, \mu_i, \alpha) = \left( \frac{\mu_i}{1 + \alpha \mu_i} \right)^{y_i} \frac{(1 + \alpha y_i)^{y_i - 1}}{y_i!} \exp \left( - \frac{\mu_i (1 + \alpha y_i)}{1 + \alpha y_i} \right), \quad y_i = 0, 1, \dots, \quad (6)$$

328  
329  
330 If  $\alpha = 0$ , the GPR model reduces to standard Poisson regression, resulting to  $E(y_i) = Var(y_i)$ . The mean  
331 of the GPR model is given as  $E(y_i|x_i) = \mu_i$  and variance  $Var(y_i|x_i) = \mu_i / (1 + \alpha \mu_i)^2$ . Clearly, when  $\alpha > 0$ ,  
332 the variance is over-dispersed, and when  $2/\mu_i < \alpha < 0$ , the variance is under-dispersed (51). The maximum  
333 likelihood estimates of the GPR parameters ( $\hat{\beta}, \hat{\alpha}$ ) can be computed by maximizing the log-likelihood of GPR  
334  $l(\beta, \alpha)$ , as:

335

$$L(\beta, \alpha) = \sum_{i=1}^n y_i \log \left( \frac{\mu_i}{1 + \alpha \mu_i} \right) + (y_i - 1) \log (1 + \alpha y_i) - \frac{\mu_i (1 + \alpha y_i)}{1 + \alpha \mu_i} - \log (\Gamma(y_i + 1)) \quad (7)$$

337

338 The Newton-Raphson numerical iteration approach is mainly used to maximize the log-likelihood  
339 function, where the first and second derivatives of the log-likelihood are required (51). The sequential iteration  
340 procedure is implemented to obtain the maximum likelihood estimates  $(\hat{\beta}, \hat{\alpha})$ .

341

## 342 **Model comparison and fitting**

343

344 In this study, two possible count models were considered, namely, the standard Poisson Regression and its  
345 generalized Poisson Regression (GPR) model. To distinguish the most suitable and well-fitted count regression  
346 model for the Mpox data, Akaike Information Criterion (AIC), Akaike Information Criterion corrected (AICc),  
347 and Bayesian Information Criterion (BIC) were used (53). After the model comparison, the GPR model was fitted  
348 to our data to model the impact of the marginalized index variables including, material deprivation, ethnic  
349 concentration, dependency ratio and residential instability on Mpox cases at the PHU level with population as an  
350 offset, while adjusting for age and gender (51). All statistical analyses were conducted using SAS (version 9.4,  
351 Cary, NC, USA) (54), and displayed as incidence rates of IRRs for Mpox with 95% CIs. Computed 95% CIs that  
352 do not include unity were considered statistically significant.

353

354

355

356

357

## Results

### Descriptive results

A total of 758 Mpox cases were notified in Ontario from 2022 to March 2024. **Fig 2** and **Fig 3** display the distribution of Mpox cases by age group and gender, respectively. The highest Mpox infection rate is among individuals aged 30–39 years, accounting for ~ 67% of Mpox cases (**Fig 2**). This age group had the highest or similarly high rates of Mpox infection across all public health units. The data also indicates that males are more frequently affected by Mpox infections than females (**Fig 3**). As evidenced in **Fig 4**, the bar chart distribution of Mpox incidence rates across Ontario indicated that the highest Mpox incidence rates were recorded in Toronto as compared to other PHUs.

**Figure 2. Distribution of Mpox by age group (2022-2024).**

**Figure 3. Distribution of Mpox by gender (2022-2024).**

**Figure 4. Bar chart of Mpox cases across the Ontario PHUs.**

### Spatial analysis results

The Choropleth map in **Fig 5** displays the geographical distribution of the Mpox incidence rate in Ontario at the PHU level. Seven of the 34 PHUs have incidence rates for Mpox greater than 2.6 per 100, 000 population, including Toronto (3895), Ottawa (2251), Peterborough (2255), Hamilton (2237), Kingston (2241), Brant County, and Middlesex-London (2244) PHUs, all of those from Eastern, Central-east, Central-west and South-west health unit regions. Another seven of the remaining 27 PHUs have incidence rates for Mpox greater than 1.2 per 100,



384 000 population including Wellington-Dufferin-Guelph (2266), Peel (2253), Halton region (2236), Windsor-Essex  
385 County (2268) Haldimand-Norfolk (2234), Durham (2230), and Niagara region (2246) PHUs, five of those from  
386 Central-west health unit region. Other PHUs had considerably low and no Mpox incidence rate was recorded in  
387 the North-west and North-east health unit regions (**Fig 5**).

388 **Figure 5. Choropleth map of geographical distribution of Mpox incidence rate in Ontario (Incidence**  
389 **rate: case per 100,000 population) (PHU names are available in Fig 1)**

390

391 The global Moran's Index value was ( $Moran's I = 0.025079, z - score = 1.433116, p - value =$   
392  $0.151825 > 0.05$ ) for Mpox incidence rate as shown in **Fig 6**. The result of the global Moran's I indicated no  
393 presence of statistically significant spatial autocorrelation in Mpox incidence rate over the whole study region  
394 (Ontario PHUs). Given the z-score of 1.433116, the Mpox spatial pattern does not appear to be significantly  
395 different than random, meaning that the Mpox incidence rate in the model is randomly distributed at the PHU  
396 level. The specific value is displayed in **Fig 6**. Therefore, applying spatial smoothing in this context would be  
397 misleading, as it assumes a spatial correlation does not exist (41).

398

399 **Figure 6. Global spatial autocorrelation analysis of Mpox incidence rate in Ontario (global Moran's I)**

400

401 The Local Moran's I statistic indicated that several Public Health Units (PHUs) in Ontario, including  
402 Toronto (3895), Peterborough (2255), Kingston (2241), Ottawa (2251), Peel (2253), Wellington-Dufferin-Guelph  
403 (2266), Middlesex-London (2244), Windsor-Essex County (2268), Halton Region (2236), Brant County (2227),  
404 Hamilton (2237), and Haldimand-Norfolk (2234), exhibited statistically significant High-Low Outliers for Mpox  
405 incidence throughout the study period (**Fig 7**).

406

407 **Figure 7. Local spatial autocorrelation analysis of Mpox incidence rate in Ontario (local Moran's I) (PHU**  
408 **names are available in Fig 1)**

409

410 **Fig 8** presents a hotspot analysis for Mpox in Ontario using the local Getis-Ord  $G_i^*$  statistic. The map  
411 clearly shows that Mpox incidence hotspots are primarily located in Toronto, with a 99% confidence level of  
412 significance. However, the cluster overlaps with neighboring PHUs, namely Durham Region (2230), Peel (2253),  
413 and York Region (2270), which have a statistically significant level of 90% (**Fig 8**). These results suggest that  
414 Toronto has neighborhoods with a high incidence of Mpox, potentially due to sociodemographic and marginalized  
415 index factors. Therefore, targeted outreach programs focusing on Mpox screening interventions and resource  
416 allocation are recommended.

417

418 **Figure 8. Getis-Ord  $G_i^*$  hotspot analysis of Mpox incidence rate in Ontario (PHU names are available in**  
419 **Fig 1)**

420

421 The spatial scan statistic revealed two spatial clusters (**Fig 10 and 11**). The primary cluster was located in  
422 one PHU (**Toronto**). There were 557 Mpox cases compared to 149 expected cases. Thus, the ratio between the  
423 observed and the expected Mpox cases was 3.74. The p-value was 0.0001, smaller than 0.05 significant level,  
424 which indicated that the cluster was highly significant. The relative risk (RR) for the population inside the cluster  
425 compared to the population outside the cluster was 11.34, indicating that the risk of Mpox within Toronto was  
426 higher than locations outside it (neighboring PHUs). The RR is estimated risk within the cluster divided by the  
427 estimated risk outside the cluster. The Log likelihood ratio of the primary cluster is 511.975.

428 The spatial scan analysis also revealed that two secondary cluster, which is the most likely clusters, were  
429 located (a) in one PHU (Ottawa), and (b) overlapped by Toronto and Hamilton PHUS (the overlapped cluster is  
430 made up of districts in Kitchener, Brampton, Guelph, Mississauga, Brantford, and London). The first secondary  
431 cluster (a) has 48 number of observed Mpox cases was, compared to 17.89 expected Mpox cases. Thus, the ratio

432 between observed and expected cases was 2.68. According to these calculations, the relative risk (RR) inside the  
433 cluster was 3.21, while the Log likelihood ratio was 19.884. The p-value was smaller than 0.05, indicating that  
434 the cluster was highly significant. The relative risk for the population inside the cluster compared to the population  
435 outside the cluster was 3.21, indicating that the risk of Mpox in Ottawa PHU was higher than locations outside  
436 the PHU (Fig 9 and 10).

437 For the second secondary cluster (b), which is made up of nine local districts, the number of observed  
438 Mpox cases was 100, compared to 73 expected Mpox cases. Thus, the ratio between the observed and expected  
439 Mpox cases was 1.37. According to these computations, the RR inside the cluster was 2.07, while the Log  
440 likelihood ratio was 9.649. The p-value was 0.0004, smaller than 0.05 level of significance, indicating that the  
441 cluster was also significant. The relative risk for the population inside the cluster compared to the population  
442 outside the cluster was 2.-7, indicating that the risk of Mpox in these areas was higher than locations outside the  
443 areas (Fig 9 and 10).

444  
445 **Figure 9: Spatial scan statistic calculated in SaTScan to detect significant Mpox local clusters.**

446  
447 **Figure 10: Spatial scan statistic calculated in SaTScan to detect significant Mpox local clusters (visualized**  
448 **in ArcGIS Pro).**

## 449 450 **Non-spatial statistical analysis results**

451  
452 Initial Global Moran's I test for spatial autocorrelation (Fig 6) indicated an absence of spatial correlation,  
453 suggesting that spatial dependence does not need to be considered in the data. However, before fitting the data,  
454 we examined the multicollinearity among the variables described in Table 1, as well as the confounding risk  
455 factors using a Pearson's correlation analysis (Fig 11), because the presence of multicollinearity among  
456 explanatory variables can cause overfitting and less reliable inferences about the associations between the

457 response and predictor variables in (55). We removed variables that were found to be highly correlated with ON-  
458 Marg dimensional factors and included other cofounding risk factors not correlated. Simultaneously, the variance  
459 inflation factor (VIF) was used to verify multicollinearity. The VIF values for all the filtered variables were less  
460 than 5, indicating no serious multicollinearity exists (55). This means that all the predictor variables in the final  
461 model were not highly correlated to each other.

462 Through the test of overdispersion in the standard Poisson regression analysis, we detected a potential problem  
463 of overdispersion. The deviance value was 30.017 and the scaled Pearson Chi-Square ( $\chi^2$ ), by degrees of freedom  
464 was 54.169, with  $p - value < 0.001$ , much bigger than one. In **Fig 12**, it was shown that the dependent variable  
465 (Mpox) is over-dispersed and has excessive zeros.

466 These findings indicate that the standard PR model does not fit our data well. PR modelling of data with  
467 overdispersion can lead to underestimation of standard errors, resulting in biased estimates of regression  
468 coefficients and misleading conclusions (48). One possible approach is to apply the generalized Poisson  
469 regression (GPR) model (51). In **Table 2**, AIC, AICc and BIC results also showed that the GPR model offers a  
470 better fit compared to the standard Poisson regression model and study was interpreted based on the results  
471 obtained from the GPR model.

472

473

474 **Figure 11: A Pearson correlation matrix illustrates the interdependence of the explanatory variables.**  
475 **Correlation coefficient values may be negative (-1) or positive (+1). If the correlation value is less than zero,**  
476 **it is weak, if it is larger than zero.**

477

478 **Figure 12. Histogram of distribution of Mpox counts in Ontario PHUs.**

479

480

481 **Table 2. Model comparison (Criteria for Assessing Goodness of Fit)**

| Description             | AIC<br>(smaller is better) | AICC<br>(smaller is better) | BIC<br>(smaller is better) |
|-------------------------|----------------------------|-----------------------------|----------------------------|
| <b>Standard Poisson</b> | 178.8521                   | 189.1598                    | 201.3582                   |
| <b>GPR</b>              | <b>163.6763</b>            | <b>183.5366</b>             | <b>174.3608</b>            |

482

483

484

485

486

487

488

489

490

The standard Poisson regression results in **Table 3** demonstrated significant p-values for all variables, however, based on the result of model comparison (**Table 2**), we fitted the GPR model to handle the issue of overdispersion inherent in our data and to estimate accurate/unbiased incidence rate ratios (IRRs) with the corresponding 95% confidence intervals (CIs).

**Table 3: Standard Poisson regression coefficients for factors affecting Mpox counts in Ontario, at PHU level.**

| Variables                                                                                              | Parameter estimate | Standard error | Relative risk (95% CI) | P-value |
|--------------------------------------------------------------------------------------------------------|--------------------|----------------|------------------------|---------|
| <b>Population density</b>                                                                              | 1.374              | 0.033          | 3.951 [1.310, 1.438]   | <0.001  |
| <b>(Racialized and Newcomer Populations or ethnic concentration or percentage of visible minority)</b> | 1.987              | 0.051          | 7.293 [1.888, 2.087]   | <0.001  |
| <b>Material resources (deprivation)</b>                                                                | 2.247              | 0.166          | 9.459 [1.922, 2.573]   | <0.001  |
| <b>Households and Dwellings (Residential Instability)</b>                                              | 6.340              | 0.129          | 56.79 [6.087, 6.593]   | <0.001  |
| <b>Increasing age (redundancy)</b>                                                                     | -0.758             | 0.120          | 0.058 [0.045, 0.073]   | <0.001  |
| <b>Married or common-law partner</b>                                                                   | -0.812             | 0.018          | 0.444 [0.429, 0.459]   | <0.001  |

491

492

493

494

495

496

The GPR model was fit (**Table 4**), however, the population density was found to be correlated to proportion of racial population (ethnic concentration), and married or common-law partners in the correlation structure of the GPR and we used only the proportion of racial population to represent both population density and married or common-law partners. After removing two of the correlated variables, the final GPR model found only two of the ON-Marg factors the proportion of racialized population (newcomer /ethnic concentration or a visible

497 minority) ( $RR = 9.478$ ;  $95\% CI = 1.621 - 2.876$ ), residential instability ( $RR = 14.112$ ;  $95\% CI =$   
 498  $1.887 - 3.407$ ), and male gender ( $RR = 5.150$ ;  $95\% CI = 1.159 - 2.119$ ) to be significant predictors of  
 499 Mpox in Ontario.

500 **Table 4: Generalized Poisson Regression coefficients for factors affecting Mpox counts in Ontario, at**  
 501 **PHU level.**

| Factor (parameter)                                                                              | Parameter Estimate | Standard Error | Relative Risk [95% Confidence Limits] | P-value |
|-------------------------------------------------------------------------------------------------|--------------------|----------------|---------------------------------------|---------|
| (Racialized and Newcomer Populations or ethnic concentration or percentage of visible minority) | 2.249              | 0.320          | 9.478 [1.621, 2.876]                  | <0.001  |
| Material resources (deprivation)                                                                | -1.461             | 1.154          | 0.232 [-3.723, 0.800]                 | 0.205   |
| Households and Dwellings (Residential Instability)                                              | 2.647              | 0.388          | 14.112 [1.887, 3.407]                 | <0.001  |
| Increasing age (redundancy)                                                                     | 0.299              | 1.376          | 1.349 [-2.399, 2.996]                 | 0.828   |
| Gender (Male)                                                                                   | 1.639              | 0.245          | 5.150 [1.159, 2.119]                  | <0.001  |

502 **Significant interaction effects**

503

504 PHU-level specific associations between Mpox occurrence and socioenvironmental factors were  
 505 examined modeling an additional interaction term. The interaction effects (**Fig 13**) show a clear increasing trend  
 506 in the rate of Mpox infection as population increased. It is worth noting that those living in the most ethnically  
 507 diverse (racial population) have a considerably higher rate of Mpox ( $p - value < 0.001$ ). The result indicated  
 508 that increasing population density and proportion of these visible minority groups statistically significantly  
 509 increased the risk of Mpox in high-risk areas ( $p - value < 0.001$ ). Interestingly, as age increases the risk of  
 510 Mpox in the population decreases ( $p - value < 0.001$ ), and as material deprivation increases in a lower  
 511 population density, Mpox infection also increases ( $p - value < 0.001$ ).

512

513 **Figure 11: Interaction effect of population density, material deprivation and Mpox (a); population density,**  
 514 **ethnic concentration and Mpox (b); population density, age and Mpox (c). The Mpox outcome is plotted as**  
 515 **the contours. The blue areas denote lower counts of Mpox, while the redder areas denote higher counts,**  
 516 **and the contours are labeled with the corresponding Mpox counts.**

517

## 518 Discussion

519 In this study, we observed that Mpox incidence rates exhibited a random spatial distribution pattern across  
520 the Public Health Units (PHUs) in Ontario based on Global Moran's Index statistic. However, we found that the  
521 risk of contracting Mpox was higher in specific PHUs and was associated with population density as well as part  
522 of area-level marginalization. The spatial scan statistics, LISA, and local Getis-Ord  $G_i^*$  statistics revealed similar  
523 results for areas with the high rates of Mpox. However, the clusters identified by the spatial scan statistics covered  
524 a wider area of Ontario districts and detected secondary and overlapping clusters. In contrast, the clusters  
525 identified by LISA and the local Getis-Ord  $G_i^*$  statistic were more dispersed. Notably, the primary Mpox hotspot  
526 area was detected in Toronto, this is an area marked by substantial internal presence of migrant population (ethnic  
527 concentration or visible minority). Specifically, Toronto has a population of ~2.8 million, with socioeconomic  
528 factors (25). The use of spatial correlation methods was effective in this study, as it enabled the identification of  
529 priority PHUs to address Mpox vaccination strategy, intervention, and resource allocation deficiencies in the  
530 province of Ontario.

531 Our study used the uniquely available 2021 marginalization index variables to evaluate the association  
532 between marginalization and overall Mpox incidence across the PHUs in Ontario using generalized Poisson  
533 regression. Based on literature, there may be a possibility of marginalized areas in both rural and urban areas at  
534 each PHUs which may have increased the risk of Mpox throughout Ontario. Although, higher proportion ethnic  
535 concentration or visible minority groups may be significantly located in urban areas and higher material  
536 deprivation greater in rural areas across the PHUs in Ontario (33). We found higher Mpox incidence rates in  
537 PHUs with higher racial population (visible minority or ethnic concentration) which is the most important  
538 predictor for high-risk Mpox incidence across PHUs in Ontario. This is in line with other recent Mpox studies  
539 (56), indicating that PHUs with dense populations, and high migration rate in Ontario, are at high risk.

540 This result indicates that human population density is an important variable in Mpox distribution, which  
541 may be caused by increased human-environment interaction among large urban centers. Areas with the greater

542 ethnic concentration had the highest risk of Mpox. Previous studies looking at the risk of other diseases like  
543 COVID-19 among immigrants and the socially deprived population in Ontario found elevated cases of the disease  
544 in some immigrant and socially deprived groups and lower rates among others (57-62). This could be attributed  
545 to immigrants or visible minority groups living in crowded households, lower income areas and working in an  
546 environment where there is frequent physical contact. The results indicate that disease spread in Ontario is  
547 associated with health inequity, meaning that some individuals may be infected by diseases because they cannot  
548 reach their full health potential and are disadvantaged from attaining it because of their race, gender, age,  
549 socioeconomic status or other socially determined factors. However, international connections of migrants and  
550 racial minorities can be significant in impacting both individual lives and broader societal dynamics, often  
551 participating actively in the economy, starting businesses, filling essential job roles, and contributing to economic  
552 growth through their labor and entrepreneurial activities.

553 The result of this study collaborates previous studies on Mpox, suggesting that younger and middle-aged  
554 adults were more vulnerable to Mpox infection, especially with male gender (22, 60). Therefore, controlling  
555 population activities and monitoring public health management and vaccination in areas with high population  
556 density can effectively control the spread of Mpox virus must target younger age groups especially the male  
557 gender. At the same time, it is necessary to improve the public's awareness of the Mpox virus, understanding the  
558 changing epidemiology of the disease is also the key to formulating prevention and control strategies. Avoiding  
559 human interaction in areas where suspicious host activities are frequent will reduce the likelihood of introducing  
560 Mpox into the scope of human activities and if Mpox is not introduced repeatedly, the infection will eventually  
561 stop occurring in Toronto and other high-risk PHUs.

562 Surprisingly, we found that after adjusting for other variables in the GPR model, the material deprivation  
563 was found to be a negative predictor to Mpox incidence in Ontario but not significant, suggesting that higher  
564 Mpox incidence occurred in PHUs with better socioeconomic indicators, however, household instability was  
565 found to be a significant risk factor for Mpox. This implies that Mpox incidence occurred in a highly



socioeconomic PHUs hence related to population density and personal interaction. Despite the progress made towards reducing health inequality in Ontario, there are certain Ontario PHUs that may not be benefiting fully from Ontario's health system improvements. It could be explained that those with low educational levels and low-income individuals typically move into areas where there is a predominant dependence on welfare assistance and other health-related services. Motives for moving regularly by such persons may be attributed to the unavailability of income and health assistance services in addition to poor prospects for employment for such a category of persons and cheaper housing rates. Similarly, findings from other studies indicated that individual income levels alone did not affect Mpox disease infection, but the relative location of residence did (62, 63).

## **Study's strength and Limitation**

There are several limitations to our study. First, we used a limited number of variables based on publicly available data at the PHU level. While Ontario marginalized index used various census variables for 2021 to define dimensions of marginalization, some details are not well captured like the issue of racism, and health literacy. Similarly, given that ON-Marg index factors only explain a portion of Mpox incidence, it is important to consider other environmental, behavioral, and biological factors that impact a population's risk of contracting Mpox. Furthermore, this study was not structured to establish causal relationships, nor does it consider all the factors that might contribute to a causal pathway. However, our study is first to use a comprehensive marginalization index as social determinants of health to better understand the incidence of Mpox in Ontario.

## **Conclusion**

This study has demonstrated geographical distribution and the impact of marginalization on Mpox incidence across the PHUs in Ontario. Our study showed that most Mpox incidences in Ontario occurred in PHUs with better socioeconomic indicators and higher population density (higher proportion racial and ethnic minority

590 groups). Additionally, household dwelling (residential instability) was found to be associated with increased risk  
591 of Mpox. Measures to enhance Mpox diagnosis and promote health equity among socioeconomically vulnerable  
592 populations, including individuals from racial and ethnic minority backgrounds, need to be put into action. This  
593 study offers valuable insights for resource allocation and policymaking for Mpox control and prevention. Further  
594 studies and policy intervention will be invaluable not only to identify and support socially marginalized  
595 populations in Ontario but also to address possible racial issues on a large scale in context of Mpox control and  
596 resource allocation.

## 597 **Conflict of Interest**

598 The authors declare that the research was conducted in the absence of any commercial or financial relationships  
599 that could be construed as a potential conflict of interest.

## 600 **Funding**

601 This research is funded by the Canadian Institute for Health Research (CIHR) under the Mpox and other  
602 zoonotic threats Team Grant (FRN. 187246).

## 603 **Acknowledgments**

604 W.A.W acknowledges financial support from the NSERC Discovery Grant (Appl No.: RGPIN-2023-05100).  
605  
606  
607  
608  
609  
610  
611  
612  
613

## References

1. WHO: **World Health Organization. Multi-country monkeypox outbreak: situation update [Internet].** . Geneva: World Health Organization, 2022 [cited 2023 August 10] Available from <https://www.who.int/emergencies/disease-outbreak-news/item/2022-DON390> 2022.
2. PublicHealthAgencyofCanada.: **Monkeypox epidemiology update.** Government of Canada Accessed November 28, 2023 2022.
3. Perramon Malavez A, Alvarez Lacalle E, Catala Sabate M, Lopez de Rioja V, Alonso Munoz S, Prats Soler C, Lopez Codina D: **Analysis of the epidemiological dynamic of monkeypox from 15th May to 31st August 2022.** *Enfermedades emergentes* 2022, **21**(3):160--167.
4. Patwary MM, Hossan J, Billah SM, Kabir MP, Rodriguez-Morales AJ: **Mapping spatio-temporal distribution of monkeypox disease incidence: A global hotspot analysis.** *New Microbes and New Infections* 2023.
5. Tambo E, Al-Nazawi AM: **Combating the global spread of poverty-related Monkeypox outbreaks and beyond.** *Infectious Diseases of Poverty* 2022, **11**(1):80.
6. Martins-Filho PR, Nicolino RR, da Silva K: **Incidence, geographic distribution, clinical characteristics, and socioeconomic and demographic determinants of monkeypox in Brazil: A nationwide population-based ecological study.** *Travel Medicine and Infectious Disease* 2023, **52**:102517.
7. Sukhdeo SS, Aldhaheri K, Lam PW, Walmsley S: **A case of human monkeypox in Canada.** *CMAJ* 2022, **194**(29):E1031--E1035.
8. Government of Canada.: **Monkeypox(mpx) epidemiology update: ( Accessed January 5, 2024).** <https://health-infobasecanadaca/mpox/#detailedCases>
9. PHOntario.: **Mpox (Monkeypox) in Ontario, Canada: May 1, 2022 to July 31, 2023 epidemiologic summary.** <https://www.publichealthontario.ca/en/Diseases-and-Conditions/Infectious-Diseases/Vector-Borne-Zoonotic-Diseases/mpox> 2024.
10. **Enhanced epidemiological summary: Mpox in Ontario: January 1, 2023 to March 31, 2024.** Toronto, ON: King's Printer for Ontario; 2024. [<https://www.publichealthontario.ca/-/media/Documents/M/24/mpox-ontario-epi-summary>]
11. **Ontario Agency for Health Protection and Promotion (Public Health Ontario). Enhanced epidemiological summary: Mpox in Ontario – May 1, 2022 to July 31, 2023.** Toronto, ON: King's Printer for Ontario; 2023. [<https://www.publichealthontario.ca/en/Diseases-and-Conditions/Infectious-Diseases/CCM/iPHIS>]
12. Carter MA, Biro S, Maier A, Shingler C, Guan TH: **COVID-19 vaccine uptake in southeastern Ontario, Canada: monitoring and addressing health inequities.** *Journal of Public Health Management and Practice* 2022, **28**(6):615-623.
13. Srivastava P, Lau TT, Ansari D, Thampi N: **Effects of socio-economic factors on elementary school student COVID-19 infections in Ontario, Canada.** *medRxiv* 2022:2022.2002.2004.22270413.
14. Ma H, Chan AK, Baral SD, Fahim C, Straus S, Sander B, Mishra S: **Which curve are we flattening? The disproportionate impact of COVID-19 among economically marginalized communities in Ontario, Canada, was unchanged from wild-type to omicron.** In: *Open Forum Infectious Diseases: 2023*: Oxford University Press US; 2023: ofac690.
15. James CE: **Racial inequity, COVID-19 and the education of Black and other marginalized students.** *Impacts of COVID-19 in racialized communities* 2021, **36**.
16. Tang I, W., Vieira V, M., Shearer E: **Effect of socioeconomic factors during the early COVID-19 pandemic: a spatial analysis.** *BMC Public Health* 2022, **22**(1):1--9.
17. Bunyasi EW, Coetzee DJ: **Relationship between socioeconomic status and HIV infection: findings from a survey in the Free State and Western Cape Provinces of South Africa.** *BMJ open* 2017, **7**(11):e016232.

- 659 18. Das SK, Bhattarai A, Paudel K, Bhusal S, Shah S, Timsina S, Subedi A, Niroula S, Alshahrani NZ, Sah S: **Socio-**  
660 **demographic determinants of the knowledge of Monkeypox Virus among the general public: a cross-sectional**  
661 **study in a Tertiary Care Center in Nepal.** *BMC Infectious Diseases* 2024, **24**(1):1-9.
- 662 19. Organization WH: **Research priorities for zoonoses and marginalized infections:** World Health Organization;  
663 2012.
- 664 20. Wallace R, Flisher AJ, Fullilove R: **Marginalization, information, and infection: risk behavior correlation in**  
665 **ghettoized sociogeographic networks and the spread of disease to majority populations.** *Environment and*  
666 *Planning A* 1997, **29**(9):1629-1645.
- 667 21. Ortiz-Saavedra B, Montes-Madariaga ES, Cabanillas-Ramirez C, Alva N, Ricardo-Martinez AaLon-F, Darwin A and  
668 Barboza, Joshuan J and Mohanty, Aroop and Padhi, Bijaya Kumar and Sah, Ranjit: **Epidemiologic Situation of HIV**  
669 **and Monkeypox Coinfection: A Systematic Review.** *Vaccines* 2023, **11**(2):246.
- 670 22. Thornhill JP, Barkati S, Walmsley S, Rockstroh J, Antinori A, Harrison LB, Palich R, Nori A, Reeves I, Habibi MS:  
671 **Monkeypox virus infection in humans across 16 countries—April–June 2022.** *New England Journal of Medicine*  
672 2022, **387**(8):679--691.
- 673 23. Movahedi Nia Z, Bragazzi N, Asgary A, Orbinski J, Wu J, Kong J: **Mpox Panic, Infodemic, and Stigmatization of the**  
674 **Two-Spirit, Lesbian, Gay, Bisexual, Transgender, Queer or Questioning, Intersex, Asexual Community:**  
675 **Geospatial Analysis, Topic Modeling, and Sentiment Analysis of a Large, Multilingual Social Media Database.**  
676 *Journal of Medical Internet Research* 2023, **25**:e45108.
- 677 24. Bragazzi NL, Han Q, Iyaniwura SA, Omame A, Shausan A, Wang X, Woldegerima WA, Wu J, Kong JD: **Adaptive**  
678 **changes in sexual behavior in the high-risk population in response to human monkeypox transmission in Canada**  
679 **can help control the outbreak: insights from a two-group, two-route epidemic model.** *Journal of Medical*  
680 *Virology* 2023:1-12.
- 681 25. Matheson F, van Ingen T: **Ontario Marginalization Index: user guide.** Toronto: St. Michael's Hospital; 2021 [joint  
682 **publication with Public Health Ontario].** In.; 2021.
- 683 26. **Ontario marginalization index: user guide** [[https://www.publichealthontario.ca/en/data-and-analysis/health-](https://www.publichealthontario.ca/en/data-and-analysis/health-equity/ontario-marginalization-index)  
684 [equity/ontario-marginalization-index](https://www.publichealthontario.ca/en/data-and-analysis/health-equity/ontario-marginalization-index)]
- 685 27. StatisticsCanada.: **Census Profile. 2021 Census of Population.** Statistics Canada Catalogue no. 98-316-X2021001.  
686 **Ottawa. Released November 15, 2023.** (table) 2021.
- 687 28. **Ministry of Health Public Health Unit Boundary**  
688 [<https://geohub.lio.gov.on.ca/datasets/c2fa5249b0c2404ea8132c051d934224/explore>]
- 689 29. iPHIS-PHOntario: **Ontario Agency for Health Protection and Promotion (Public Health Ontario). Multi-**  
690 **jurisdictional monkeypox outbreak 2022 – what we know so far** [Internet]. 2nd revision. Toronto, ON: King's  
691 **Printer for Ontario; 2022 [cited 2023 August 10]. Available from:** [https://wwwpublichealthontarioca/-](https://wwwpublichealthontarioca/-/media/Documents/M/2022/wwksf-multi-jurisdictional-monkeypox-outbreak-2022pdf?sc_lang=en)  
692 [/media/Documents/M/2022/wwksf-multi-jurisdictional-monkeypox-outbreak-2022pdf?sc\\_lang=en](https://wwwpublichealthontarioca/-/media/Documents/M/2022/wwksf-multi-jurisdictional-monkeypox-outbreak-2022pdf?sc_lang=en) 2022.
- 693 30. ArcGIS.: **Desktop, ESRI ArcGIS Pro.** Redlands, CA: Environmental Systems Research Institute 2019.
- 694 31. StatisticsCanada.: **Health Region Boundary Files** [Internet], 2011 [Cited November 1, 2023]. Accessed July 17 2023  
695 [https://www12statcanqcca/census-recensement/2021/qeo/sip-pis/boundary-limités/index2021-](https://www12statcanqcca/census-recensement/2021/qeo/sip-pis/boundary-limités/index2021-engcfm?year=21)  
696 [engcfm?year=21](https://www12statcanqcca/census-recensement/2021/qeo/sip-pis/boundary-limités/index2021-engcfm?year=21) 2021.
- 697 32. **Health in Peel: Determinants and disparities. Region of Peel report/determinants/pdf/MOH-**  
698 **0036\_Determinants\_final.pdf.** [<https://www.peelregion.ca/health/health-status->]
- 699 33. Matheson FI, Dunn JR, Smith KL, Moineddin R, Glazier RH: **Development of the Canadian Marginalization Index:**  
700 **a new tool for the study of inequality.** *Canadian Journal of Public Health/Revue Canadienne de Sante'e Publique*  
701 2012:S12-S16.
- 702 34. **OH Central Local Areas Ontario Marginalization Index (ON-Marg) 2021**  
703 [<https://www.publichealthontario.ca/en/Data-and-Analysis/Health-Equity/Ontario-Marginalization-Index>]
- 704 35. **ArcGIS Pro. Ed. Redlands, Ca: Environmental Systems Research Institute.** [[https://www.esri.com/en-](https://www.esri.com/en-us/arcgis/products/arcgis-pro/overview)  
705 [us/arcgis/products/arcgis-pro/overview](https://www.esri.com/en-us/arcgis/products/arcgis-pro/overview)]
- 706 36. Bertici R, Herbei M, Oncia S, Smuleac L: **Comparative analysis of Mercator and UTM map projections.** *Research*  
707 *Journal of Agricultural Science* 2014, **46**(2).

- 708 37. Moran P: **Notes on continuous stochastic phenomena**. *Biometrika* 1950, **37**(1):17--23.
- 709 38. Tobler WR: **A computer movie simulating urban growth in the Detroit region**. *Economic geography* 1970, **46**(sup1):234--240.
- 710
- 711 39. Anselin L: **Local spatial autocorrelation**. *Other Local Spatial Autocorrelation Statistics* 2020.
- 712 40. Anselin L: **Local indicators of spatial association—LISA**. *Geographical analysis* 1995, **27**(2):93--115.
- 713 41. Hutchinson MK, Holtman MC: **Analysis of count data using poisson regression**. *Research in nursing & health* 2005, **28**(5):408--418.
- 714
- 715 42. Darnah D: **Modelling of filariasis in East Java with Poisson regression and generalized Poisson regression models**. In: *AIP Conference Proceedings: 2016*: AIP Publishing; 2016.
- 716
- 717 43. Consul P, Famoye F: **Generalized Poisson regression model**. *Communications in Statistics-Theory and Methods* 1992, **21**(1):89-109.
- 718
- 719 44. Famoye F, Wulu JT, Singh KP: **On the generalized Poisson regression model with an application to accident data**. *Journal of Data Science* 2004, **2**(3):287-295.
- 720
- 721 45. Saputro DRS, Susanti A, Pratiwi NBI: **The handling of overdispersion on Poisson regression model with the generalized Poisson regression model**. In: *AIP Conference Proceedings: 2021*: AIP Publishing; 2021.
- 722
- 723 46. Akaike H: **Information theory and an extension of the maximum likelihood principle**. In: *Selected papers of hirotugu akaike*. edn.: Springer; 1998: 199--213.
- 724
- 725 47. Kim JH: **Multicollinearity and misleading statistical results**. *Korean journal of anesthesiology* 2019, **72**(6):558--569.
- 726
- 727 48. SAS: **SAS Version 9.4 of the SAS System for Windows**. Cary, NC: SAS Institute Inc 2013, **2016**.
- 728 49. Nguyen P-Y, Ajisegiri WS, Costantino V, Chughtai AA, MacIntyre CR: **Reemergence of human monkeypox and declining population immunity in the context of urbanization, Nigeria, 2017–2020**. *Emerging Infectious Diseases* 2021, **27**(4):1007.
- 729
- 730
- 731 50. Obress L, Berke O, Fisman DN, Tuite AR, Greer AL: **Sporadic SARS-CoV-2 cases at the neighbourhood level in Toronto, Ontario, 2020: a spatial analysis of the early pandemic period**. *Canadian Medical Association Open Access Journal* 2022, **10**(1):E190-E195.
- 732
- 733
- 734 51. Zygmunt A, Tanuseputro P, James P, Lima I, Tuna M, Kendall CE: **Neighbourhood-level marginalization and avoidable mortality in Ontario, Canada: a population-based study**. *Canadian Journal of Public Health* 2020, **111**:169-181.
- 735
- 736
- 737 52. Chiodo S, Buajitti E, Rosella L: **Epidemiology of COVID-19 Among healthcare workers In Ontario, Canada during The first pandemic wave**. *University of Toronto Journal of Public Health* 2021, **2**(1).
- 738
- 739 53. Ferrao J, Niquisse S, Mendes J, Painho M: **Mapping and modelling malaria risk areas using climate, socio-demographic and clinical variables in Chimoio, Mozambique**. *International journal of environmental research and public health* 2018, **15**(4):795.
- 740
- 741
- 742 54. Vivancos R, Anderson C, Blomquist P, Balasegaram S, Bell A, Bishop L, Brown CS, Chow Y, Edeghere O, Florence I: **Community transmission of monkeypox in the United Kingdom, April to May 2022**. *Eurosurveillance* 2022, **27**(22):2200422.
- 743
- 744
- 745 55. Rimoin AW, Mulembakani PM, Johnston SC, Lloyd Smith JO, Kisalu NK, Kinkela TL, Blumberg S, Thomassen HA, Pike BL, Fair JN: **Major increase in human monkeypox incidence 30 years after smallpox vaccination campaigns cease in the Democratic Republic of Congo**. *Proceedings of the National Academy of Sciences* 2010, **107**(37):16262--16267.
- 746
- 747
- 748
- 749
- 750
- 751 1. WHO. World Health Organization. Multi-country monkeypox outbreak: situation update [Internet]. . Geneva: World Health Organization, 2022 [cited 2023 August 10] Available from [https://www.who.int/emergencies/diseases-outbreak-news/item/2022-DON390](https://www.who.int/emergencies/diseases/outbreak-news/item/2022-DON390). 2022.
- 752
- 753



- 754 2. PublicHealthAgencyofCanada. Monkeypox epidemiology update. Government of Canada Accessed November 28,  
755 2023 2022.
- 756 3. Perramon Malavez A, Alvarez Lacalle E, Catala Sabate M, Lopez de Rioja V, Alonso Munoz S, Prats Soler C, et al.  
757 Analysis of the epidemiological dynamic of monkeypox from 15th May to 31st August 2022. *Enfermedades emergentes*.  
758 2022;21(3):160--7.
- 759 4. Patwary MM, Hossan J, Billah SM, Kabir MP, Rodriguez-Morales AJ. Mapping spatio-temporal distribution of  
760 monkeypox disease incidence: A global hotspot analysis. *New Microbes and New Infections*. 2023.
- 761 5. Tambo E, Al-Nazawi AM. Combating the global spread of poverty-related Monkeypox outbreaks and beyond.  
762 *Infectious Diseases of Poverty*. 2022;11(1):80.
- 763 6. Martins-Filho PR, Nicolino RR, da Silva K. Incidence, geographic distribution, clinical characteristics, and  
764 socioeconomic and demographic determinants of monkeypox in Brazil: A nationwide population-based ecological study.  
765 *Travel Medicine and Infectious Disease*. 2023;52:102517.
- 766 7. Sukhdeo SS, Aldhaferi K, Lam PW, Walmsley S. A case of human monkeypox in Canada. *CMAJ*.  
767 2022;194(29):E1031--E5.
- 768 8. GovernmentofCanada. Monkeypox(mpx) epidemiology update: ( Accessed January 5, 2024). [https://health-](https://health-infobasecanadaca/mpox/#detailedCases)  
769 [infobasecanadaca/mpox/#detailedCases](https://health-infobasecanadaca/mpox/#detailedCases)  
770 2022.
- 771 9. PHOntario. Mpox (Monkeypox) in Ontario, Canada: May 1, 2022 to July 31, 2023 epidemiologic summary.  
772 [https://wwwpublichealthontarioca/en/Diseases-and-Conditions/Infectious-Diseases/Vector-Borne-Zoonotic-](https://wwwpublichealthontarioca/en/Diseases-and-Conditions/Infectious-Diseases/Vector-Borne-Zoonotic-Diseases/mpox)  
773 [Diseases/mpox](https://wwwpublichealthontarioca/en/Diseases-and-Conditions/Infectious-Diseases/Vector-Borne-Zoonotic-Diseases/mpox). 2024.
- 774 10. PHOntario. Enhanced epidemiological summary: Mpox in Ontario: January 1, 2023 to March 31, 2024. Toronto,  
775 ON: King's Printer for Ontario; 2024.: Ontario Agency for Health Protection and Promotion (Public Health Ontario). ; 2024  
776 [updated March 20, 2024. Available from: [https://www.publichealthontario.ca/-/media/Documents/M/24/mpox-](https://www.publichealthontario.ca/-/media/Documents/M/24/mpox-ontario-epi-summary)  
777 [ontario-epi-summary](https://www.publichealthontario.ca/-/media/Documents/M/24/mpox-ontario-epi-summary).
- 778 11. iPHIS-PHOntario. Ontario Agency for Health Protection and Promotion (Public Health Ontario). Multi-jurisdictional  
779 monkeypox outbreak 2022 – what we know so far [Internet]. 2nd revision. Toronto, ON: King's Printer for Ontario; 2022  
780 [cited 2023 August 10]. Available from: [https://wwwpublichealthontarioca/-/media/Documents/M/2022/wwksf-multi-](https://wwwpublichealthontarioca/-/media/Documents/M/2022/wwksf-multi-jurisdictional-monkeypox-outbreak-2022pdf?sc_lang=en)  
781 [jurisdictional-monkeypox-outbreak-2022pdf?sc\\_lang=en](https://wwwpublichealthontarioca/-/media/Documents/M/2022/wwksf-multi-jurisdictional-monkeypox-outbreak-2022pdf?sc_lang=en). 2022.
- 782 12. Carter MA, Biro S, Maier A, Shingler C, Guan TH. COVID-19 vaccine uptake in southeastern Ontario, Canada:  
783 monitoring and addressing health inequities. *Journal of Public Health Management and Practice*. 2022;28(6):615-23.
- 784 13. Srivastava P, Lau TT, Ansari D, Thampi N. Effects of socio-economic factors on elementary school student COVID-  
785 19 infections in Ontario, Canada. *medRxiv*. 2022:2022.02. 04.22270413.
- 786 14. Ma H, Chan AK, Baral SD, Fahim C, Straus S, Sander B, et al., editors. Which curve are we flattening? The  
787 disproportionate impact of COVID-19 among economically marginalized communities in Ontario, Canada, was unchanged  
788 from wild-type to omicron. *Open Forum Infectious Diseases*; 2023: Oxford University Press US.
- 789 15. James CE. Racial inequity, COVID-19 and the education of Black and other marginalized students. *Impacts of*  
790 *COVID-19 in racialized communities*. 2021;36.
- 791 16. Tang I, W., Vieira V, M., Shearer E. Effect of socioeconomic factors during the early COVID-19 pandemic: a spatial  
792 analysis. *BMC Public Health*. 2022;22(1):1--9.
- 793 17. Bunyasi EW, Coetzee DJ. Relationship between socioeconomic status and HIV infection: findings from a survey in  
794 the Free State and Western Cape Provinces of South Africa. *BMJ open*. 2017;7(11):e016232.
- 795 18. Das SK, Bhattarai A, Paudel K, Bhusal S, Shah S, Timsina S, et al. Socio-demographic determinants of the knowledge  
796 of Monkeypox Virus among the general public: a cross-sectional study in a Tertiary Care Center in Nepal. *BMC Infectious*  
797 *Diseases*. 2024;24(1):1-9.
- 798 19. WHO. Research priorities for zoonoses and marginalized infections: World Health Organization; 2012.
- 799 20. Wallace R, Flisher AJ, Fullilove R. Marginalization, information, and infection: risk behavior correlation in  
800 ghettoized sociogeographic networks and the spread of disease to majority populations. *Environment and Planning A*.  
801 1997;29(9):1629-45.

21. Ortiz-Saavedra B, Montes-Madariaga ES, Cabanillas-Ramirez C, Alva N, Ricardo-Martinez AaLon-F, Darwin A and Barboza, Joshuan J and Mohanty, Aroop and Padhi, Bijaya Kumar and Sah, Ranjit. Epidemiologic Situation of HIV and Monkeypox Coinfection: A Systematic Review. *Vaccines*. 2023;11(2):246.
22. Thornhill JP, Barkati S, Walmsley S, Rockstroh J, Antinori A, Harrison LB, et al. Monkeypox virus infection in humans across 16 countries—April--June 2022. *New England Journal of Medicine*. 2022;387(8):679--91.
23. Movahedi Nia Z, Bragazzi N, Asgary A, Orbinski J, Wu J, Kong J. Mpox Panic, Infodemic, and Stigmatization of the Two-Spirit, Lesbian, Gay, Bisexual, Transgender, Queer or Questioning, Intersex, Asexual Community: Geospatial Analysis, Topic Modeling, and Sentiment Analysis of a Large, Multilingual Social Media Database. *Journal of Medical Internet Research*. 2023;25:e45108.
24. Bragazzi NL, Han Q, Iyaniwura SA, Omame A, Shausan A, Wang X, et al. Adaptive changes in sexual behavior in the high-risk population in response to human monkeypox transmission in Canada can help control the outbreak: insights from a two-group, two-route epidemic model. *Journal of Medical Virology*. 2023:1-12.
25. Matheson F, van Ingen T. Ontario Marginalization Index: user guide. Toronto: St. Michael's Hospital; 2021 [joint publication with Public Health Ontario]. 2021.
26. Matheson F, Moloney G, Van Ingen T. Ontario marginalization index: user guide Toronto2021 [updated March 2, 2024]. Available from: <https://www.publichealthontario.ca/en/data-and-analysis/health-equity/ontario-marginalization-index>.
27. StatisticsCanada. Census Profile. 2021 Census of Population. Statistics Canada Catalogue no. 98-316-X2021001. Ottawa. Released November 15, 2023. (table). 2021.
28. GovernmentofOntario. Ministry of Health Public Health Unit Boundary 2021 [updated January 4, 2023]. Available from: <https://geohub.lio.gov.on.ca/datasets/c2fa5249b0c2404ea8132c051d934224/explore>.
29. ArcGIS. Desktop, ESRI ArcGIS Pro. Redlands, CA: Environmental Systems Research Institute. 2019.
30. StatisticsCanada. Health Region Boundary Files [Internet], 2011 [Cited November 1, 2023]. Accessed July 17 2023 <https://www12statcangcca/census-recensement/2021/geo/sip-pis/boundary-limités/index2021-engcfm?year=21>. 2021.
31. StatisticsCanadaN. Census Profile. 2021 Census of Population. Statistics Canada Catalogue no. 98-316-X2021001. Ottawa. Released November 15, 2023. <https://www12statcangcca/census-recensement/2021/dp-pd/prof/indexcfm?Lang=E> (accessed January 27, 2024). 2023.
32. PeelPublicHealth. Health in Peel: Determinants and disparities. Region of Peel report/determinants/pdf/MOH-0036\_Determinants\_final.pdf. 2011 [updated March 1, 2024]. Available from: <https://www.peelregion.ca/health/health-status->.
33. Matheson FI, Dunn JR, Smith KL, Moineddin R, Glazier RH. Development of the Canadian Marginalization Index: a new tool for the study of inequality. *Canadian Journal of Public Health/Revue Canadienne de Sante'e Publique*. 2012:S12-S6.
34. ON-Marg. OH Central Local Areas Ontario Marginalization Index (ON-Marg) 2021 2021 [updated March 12, 2024]. Available from: <https://www.publichealthontario.ca/en/Data-and-Analysis/Health-Equity/Ontario-Marginalization-Index>.
35. ArcGIS. ArcGIS Pro. Redlands, CA: Environmental Systems Research Institute. 2019.
36. Moran P. Notes on continuous stochastic phenomena. *Biometrika*. 1950;37(1):17--23.
37. Tobler WR. A computer movie simulating urban growth in the Detroit region. *Economic geography*. 1970;46(sup1):234--40.
38. Chou Y-H. Spatial pattern and spatial autocorrelation. *International Conference on Spatial Information Theory*: Springer; 1995. p. 365--76.
39. Anselin L. Local indicators of spatial association—LISA. *Geographical analysis*. 1995;27(2):93--115.
40. Ord JK, Getis A. Testing for local spatial autocorrelation in the presence of global autocorrelation. *Journal of regional science*. 2001;41(3):411--32.
41. Anselin L. Local spatial autocorrelation. *Other Local Spatial Autocorrelation Statistics*. 2020.
42. Getis A. Spatial autocorrelation. *Handbook of applied spatial analysis: Software tools, methods and applications*2009. p. 255--78.
43. Kulldorff M. SaTScanTM user guide. Boston; 2006.
44. Kulldorff M. Spatial scan statistics: models, calculations, and applications. Springer; 1999.

- 851 45. Kulldorff M. A spatial scan statistic. *Communications in Statistics-Theory and methods*. 1997;26(6):1481-96.
- 852 46. Waller LA, Gotway CA. *Applied spatial statistics for public health data*: John Wiley & Sons; 2004.
- 853 47. Pan W. Akaike's information criterion in generalized estimating equations. *Biometrics*. 2001;57(1):120--5.
- 854 48. Hutchinson MK, Holtman MC. Analysis of count data using poisson regression. *Research in nursing & health*.
- 855 2005;28(5):408--18.
- 856 49. Darnah D, editor *Modelling of filariasis in East Java with Poisson regression and generalized Poisson regression*
- 857 *models*. AIP Conference Proceedings; 2016: AIP Publishing.
- 858 50. Famoye F, Wulu JT, Singh KP. On the generalized Poisson regression model with an application to accident data.
- 859 *Journal of Data Science*. 2004;2(3):287-95.
- 860 51. Consul P, Famoye F. Generalized Poisson regression model. *Communications in Statistics-Theory and Methods*.
- 861 1992;21(1):89-109.
- 862 52. Saputro DRS, Susanti A, Pratiwi NBI, editors. *The handling of overdispersion on Poisson regression model with the*
- 863 *generalized Poisson regression model*. AIP Conference Proceedings; 2021: AIP Publishing.
- 864 53. Akaike H. Information theory and an extension of the maximum likelihood principle. *Selected papers of hirotugu*
- 865 *akaike*: Springer; 1998. p. 199--213.
- 866 54. SAS. *SAS Version 9.4 of the SAS System for Windows*. Cary, NC: SAS Institute Inc. 2013;2016.
- 867 55. Kim JH. Multicollinearity and misleading statistical results. *Korean journal of anesthesiology*. 2019;72(6):558--69.
- 868 56. Nguyen P-Y, Ajisegiri WS, Costantino V, Chughtai AA, MacIntyre CR. Reemergence of human monkeypox and
- 869 *declining population immunity in the context of urbanization, Nigeria, 2017–2020*. *Emerging Infectious Diseases*.
- 870 2021;27(4):1007.
- 871 57. Obress L, Berke O, Fisman DN, Tuite AR, Greer AL. Sporadic SARS-CoV-2 cases at the neighbourhood level in
- 872 *Toronto, Ontario, 2020: a spatial analysis of the early pandemic period*. *Canadian Medical Association Open Access*
- 873 *Journal*. 2022;10(1):E190-E5.
- 874 58. Zygmunt A, Tanuseputro P, James P, Lima I, Tuna M, Kendall CE. Neighbourhood-level marginalization and
- 875 *avoidable mortality in Ontario, Canada: a population-based study*. *Canadian Journal of Public Health*. 2020;111:169-81.
- 876 59. Chiodo S, Buajitti E, Rosella L. Epidemiology of COVID-19 Among healthcare workers In Ontario, Canada during
- 877 *The first pandemic wave*. *University of Toronto Journal of Public Health*. 2021;2(1).
- 878 60. Ferrao J, Niquisse S, Mendes J, Painho M. Mapping and modelling malaria risk areas using climate, socio-
- 879 *demographic and clinical variables in Chimoio, Mozambique*. *International journal of environmental research and public*
- 880 *health*. 2018;15(4):795.
- 881 61. Vivancos R, Anderson C, Blomquist P, Balasegaram S, Bell A, Bishop L, et al. Community transmission of monkeypox
- 882 *in the United Kingdom, April to May 2022*. *Eurosurveillance*. 2022;27(22):2200422.
- 883 62. Rimoin AW, Mulembakani PM, Johnston SC, Lloyd Smith JO, Kisalu NK, Kinkela TL, et al. Major increase in human
- 884 *monkeypox incidence 30 years after smallpox vaccination campaigns cease in the Democratic Republic of Congo*.
- 885 *Proceedings of the National Academy of Sciences*. 2010;107(37):16262--7.
- 886 63. Arotolu TE, Afe AE, Wang H, Lv J, Shi K, Huang L, et al. Spatial modeling and ecological suitability of monkeypox
- 887 *disease in Southern Nigeria*. *Plos one*. 2022;17(9):e0274325.



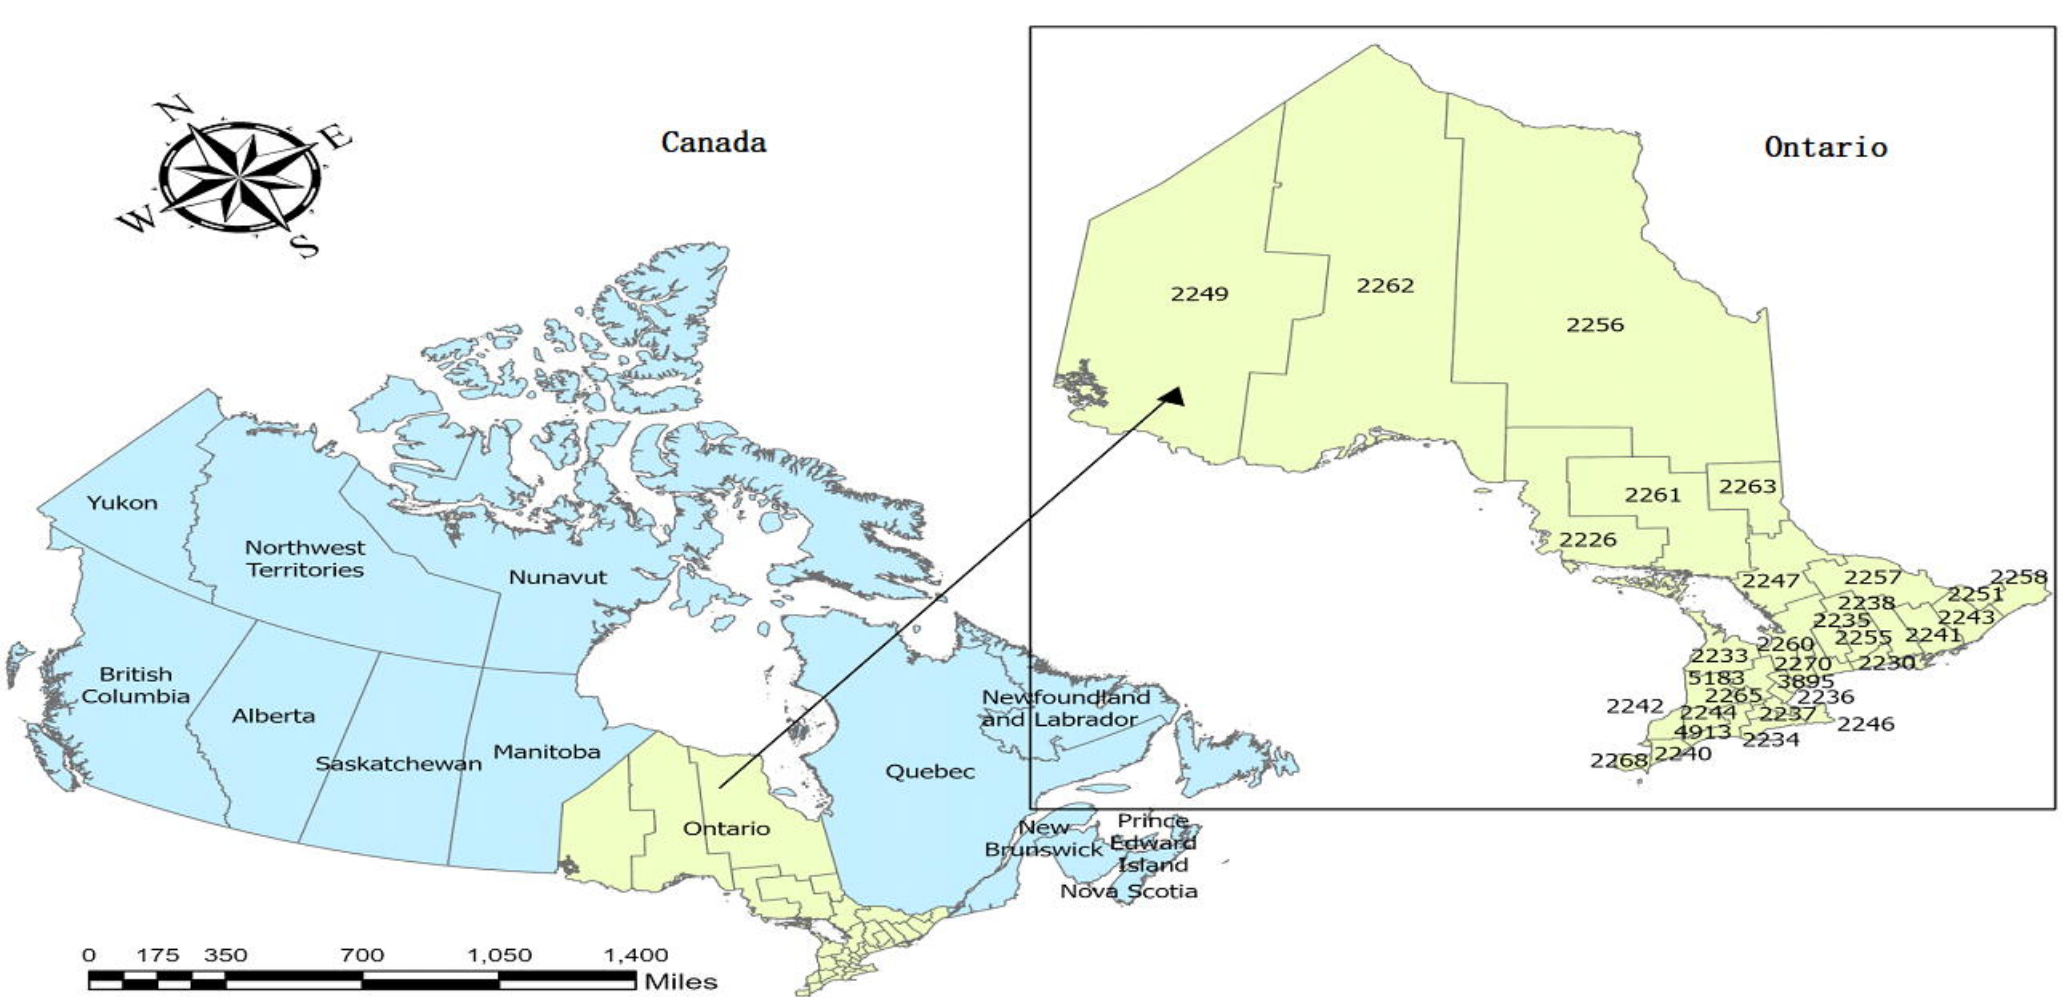

| NAME                    | PHU-ID |
|-------------------------|--------|
| Algoma Public Health..  | 2226   |
| Brant County Health..   | 2227   |
| Durham Region Heal..    | 2230   |
| Grey Bruce Health U..   | 2233   |
| Haldimand-Norfolk ..    | 2234   |
| Haliburton, Kawarth..   | 2235   |
| Halton Region Healt..   | 2236   |
| Hamilton Public Hea..   | 2237   |
| Hastings and Prince ..  | 2238   |
| Chatham-Kent Healt..    | 2240   |
| Kingston, Frontenac ..  | 2241   |
| Lambton Public Heal..   | 2242   |
| Leeds, Grenville and .. | 2243   |
| Middlesex-London H..    | 2244   |
| Niagara Region Publ..   | 2246   |
| North Bay Parry Sou..   | 2247   |
| Northwestern Healt..    | 2249   |
| Ottawa Public Health    | 2251   |
| Peel Public Health      | 2253   |
| Peterborough Public..   | 2255   |
| Porcupine Health Un..   | 2256   |
| Renfrew County and..    | 2257   |
| Eastern Ontario Hea..   | 2258   |
| Simcoe Muskoka Dis..    | 2260   |
| Sudbury and District..  | 2261   |
| Thunder Bay District..  | 2262   |
| Timiskaming Health ..   | 2263   |
| Region of Waterloo, ..  | 2265   |
| Wellington-Dufferin..   | 2266   |
| Windsor-Essex Coun..    | 2268   |
| York Region Public H..  | 2270   |
| Toronto Public Health   | 3895   |
| Southwestern Publi..    | 4913   |
| Huron Perth Health ...  | 5183   |

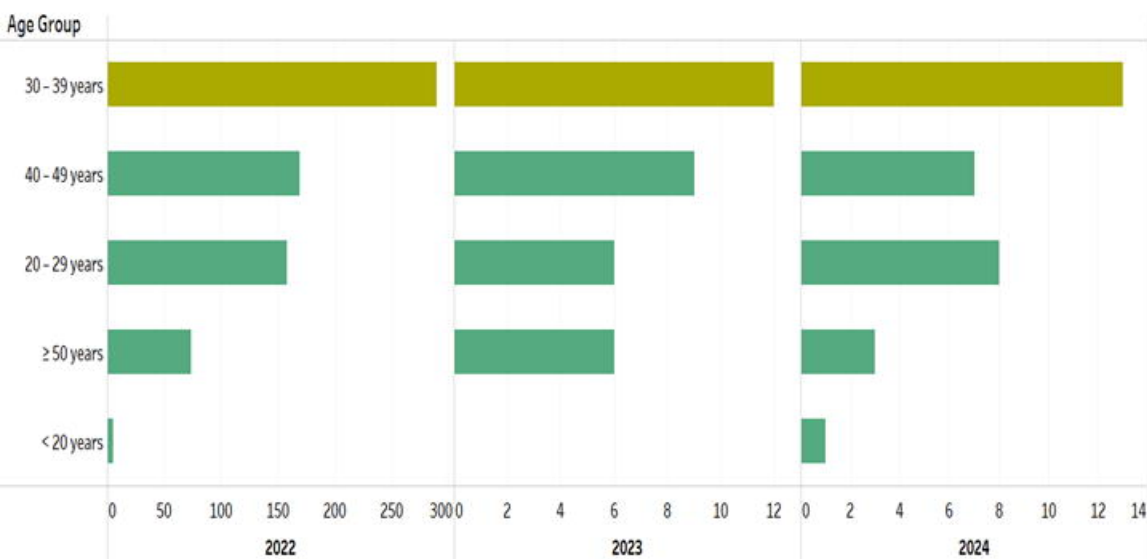

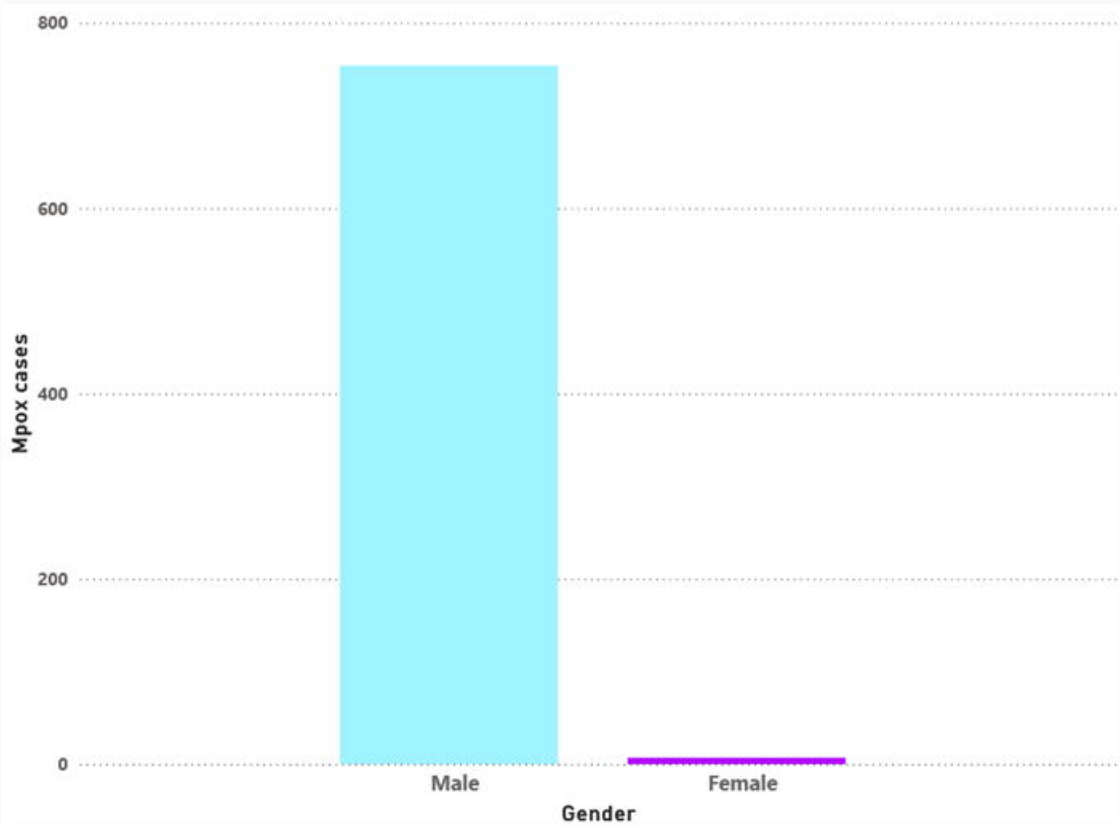

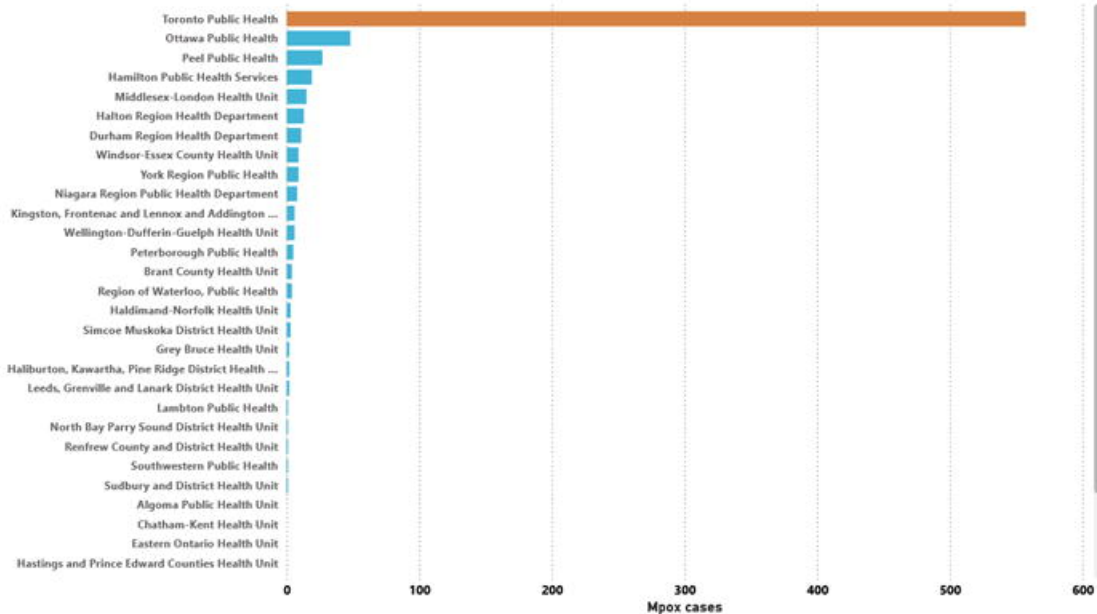

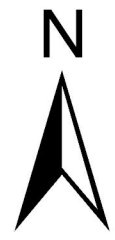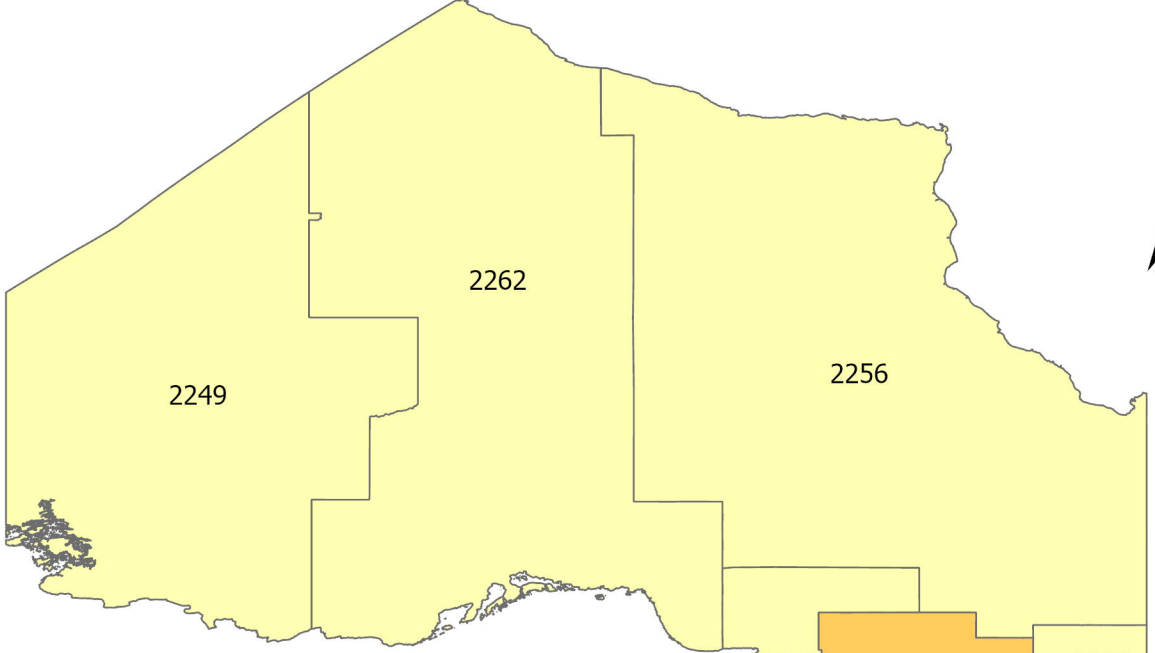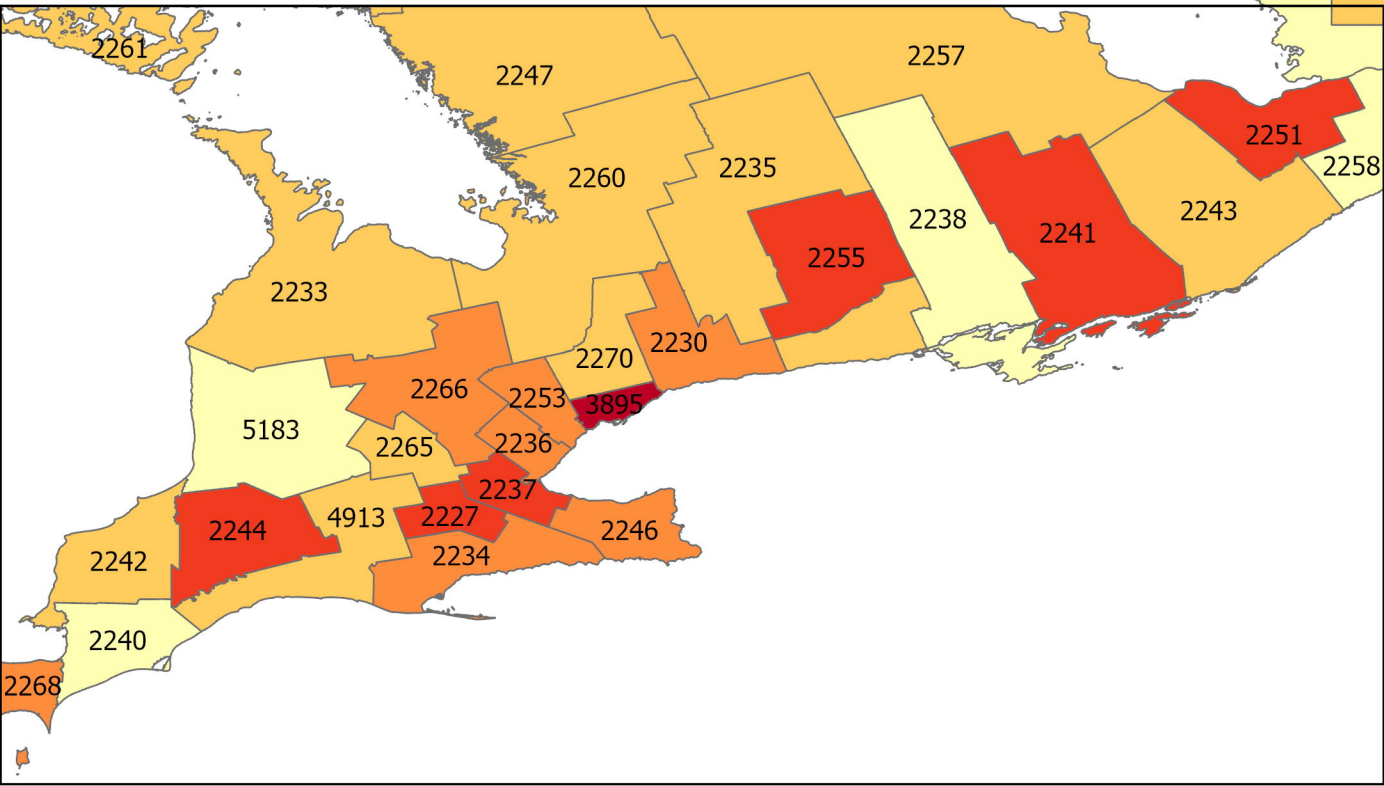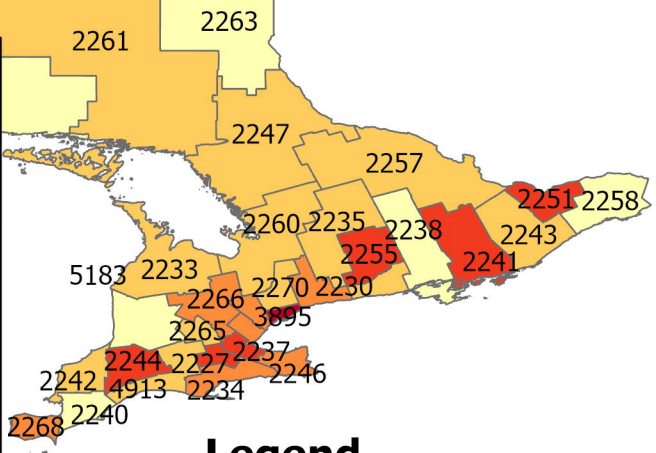

### Legend

PHU-Level  
Mpox Incidence Rate

|                      |
|----------------------|
| 0.000000             |
| 0.000001 - 1.150000  |
| 1.150001 - 2.570000  |
| 2.570001 - 4.520000  |
| 4.520001 - 19.930000 |

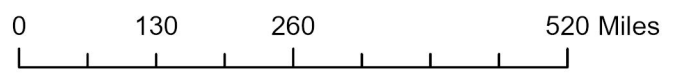

Moran's Index 0.025079

z-score 1.433116

p-value 0.151825

Significance Level  
(p-value)

0.01

0.05

0.10

---

0.10

0.05

0.01

Critical Value  
(z-score)

< -2.58

-2.58 - -1.96

-1.96 - -1.65

-1.65 - 1.65

1.65 - 1.96

1.96 - 2.58

> 2.58

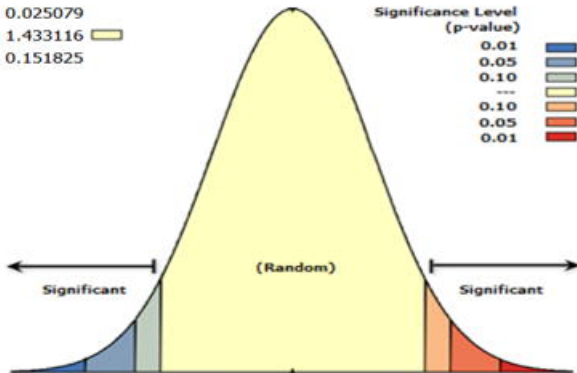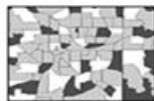

Dispersed

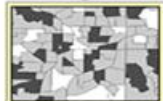

Random

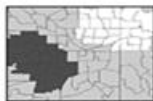

Clustered



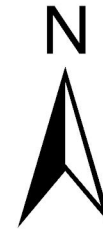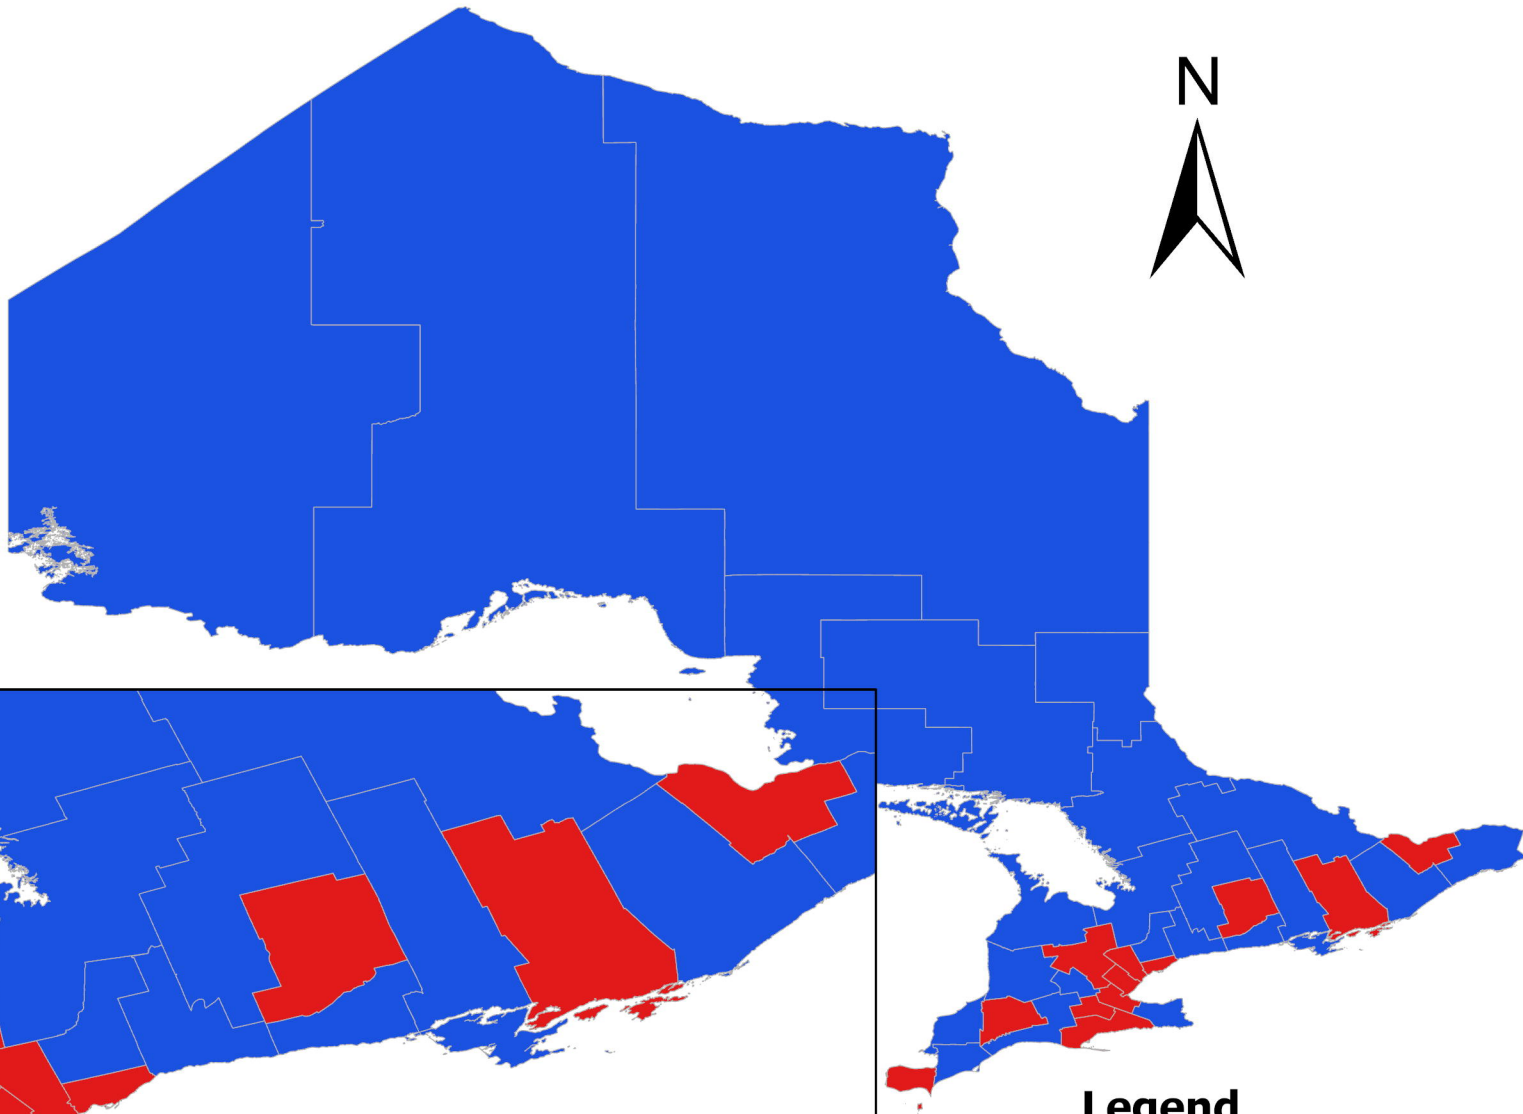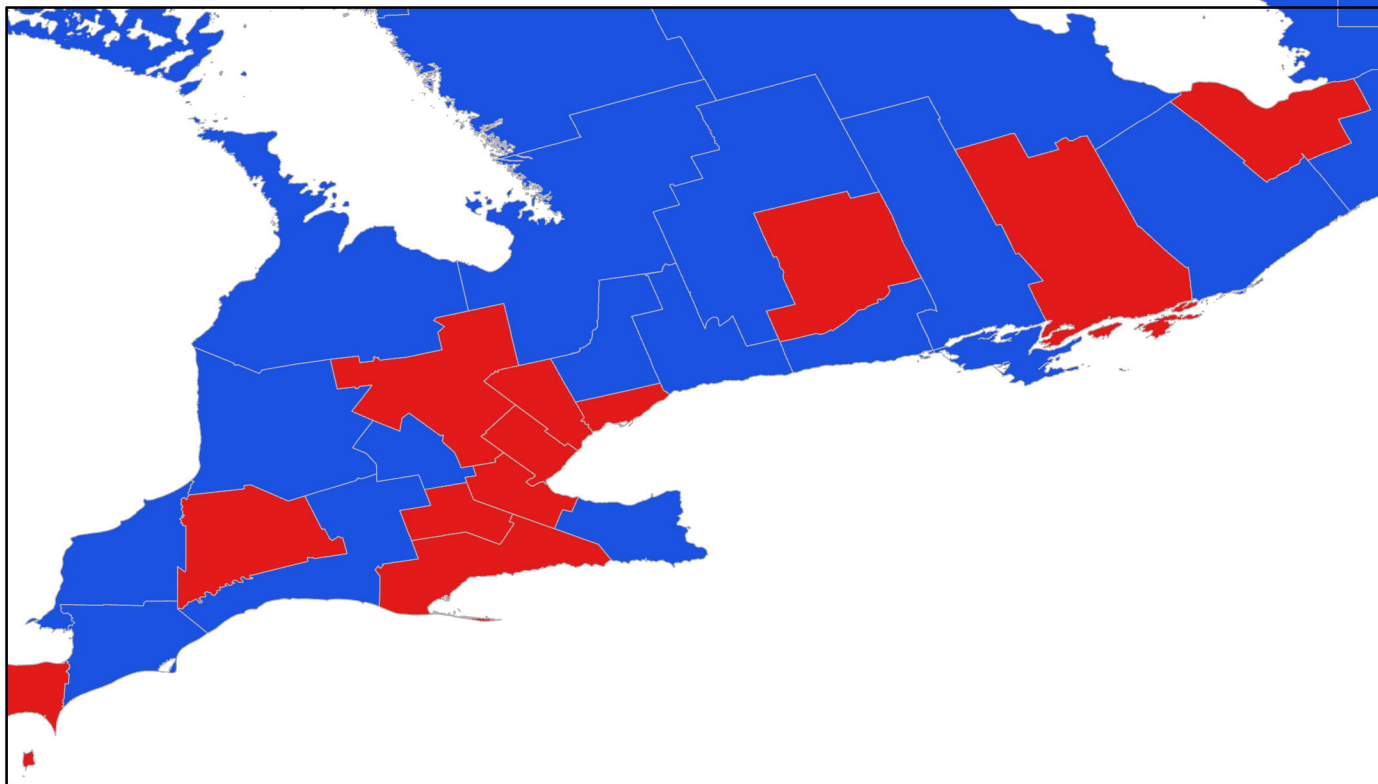

### Legend

#### PHU-Level/Clusters and Outliers

-  High-High cluster
-  High-Low outlier
-  Low-High outlier
-  Low-Low cluster
-  Not significant

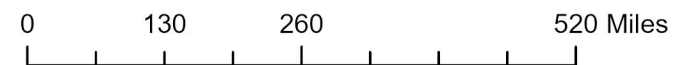

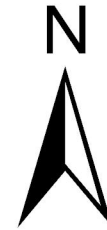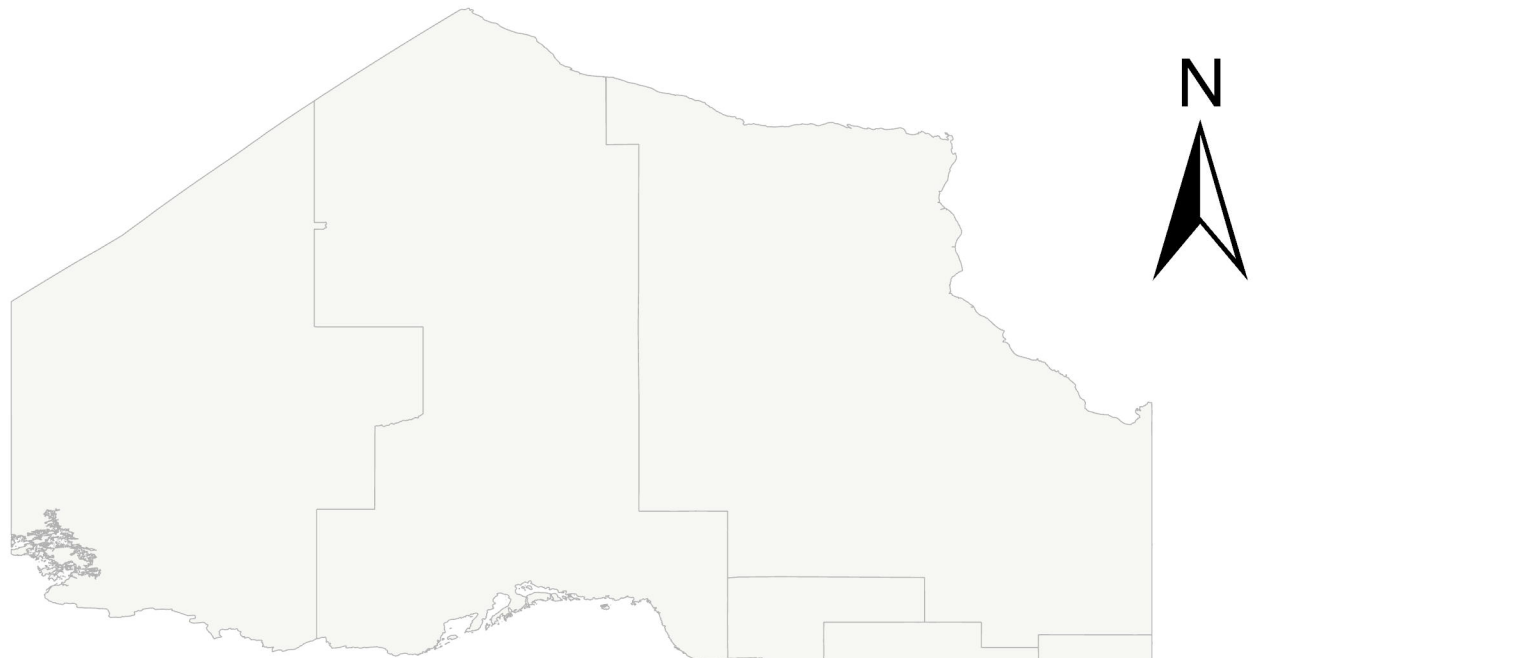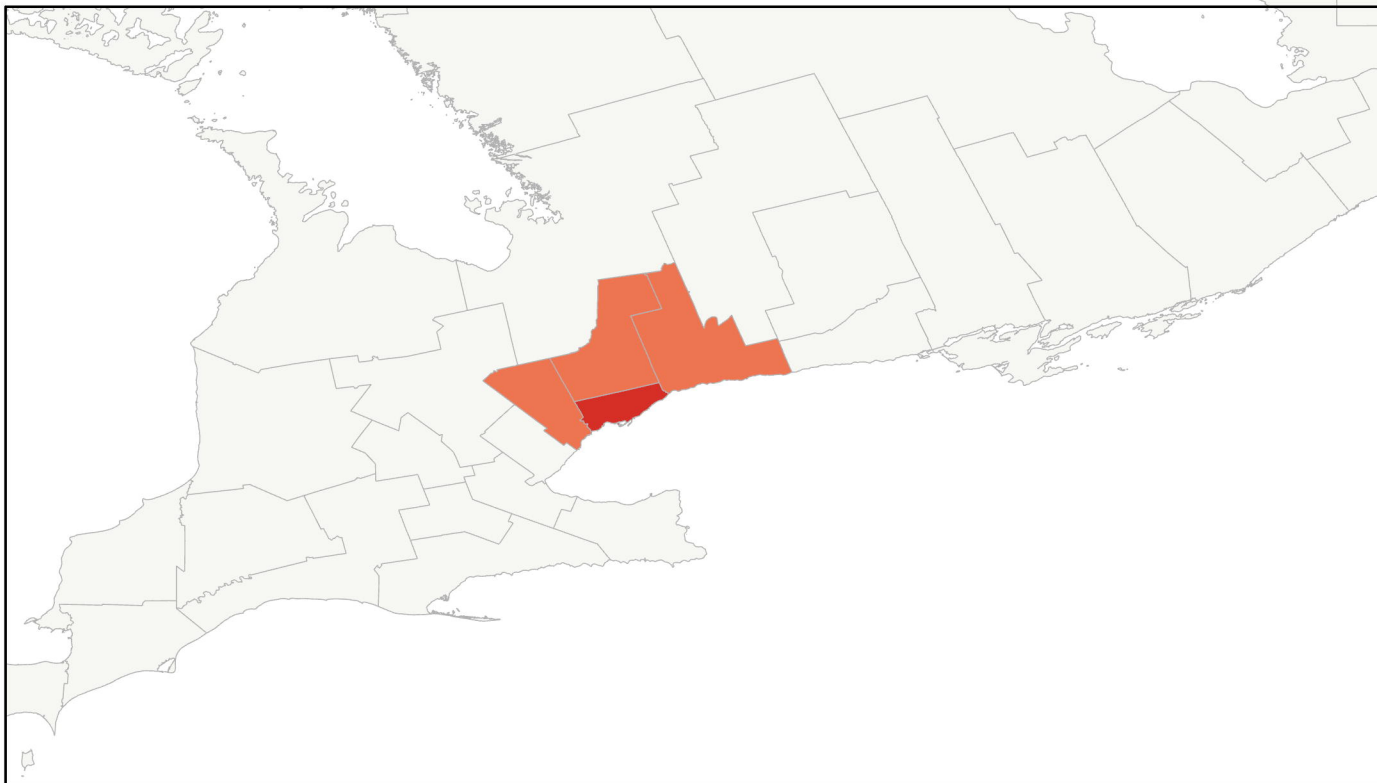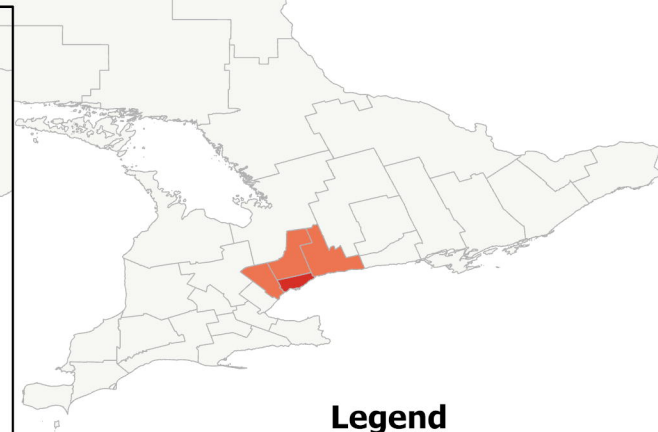

### Legend

#### Mpox HotSpots

- 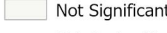 Not Significant
-  Hot Spot with 90% Confidence
-  Hot Spot with 95% Confidence
-  Hot Spot with 99% Confidence

#### Gi\_Bin

-  Cold Spot with 99% Confidence
-  Cold Spot with 95% Confidence
-  Cold Spot with 90% Confidence

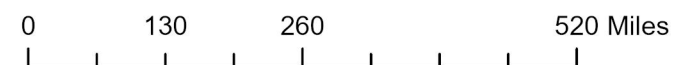



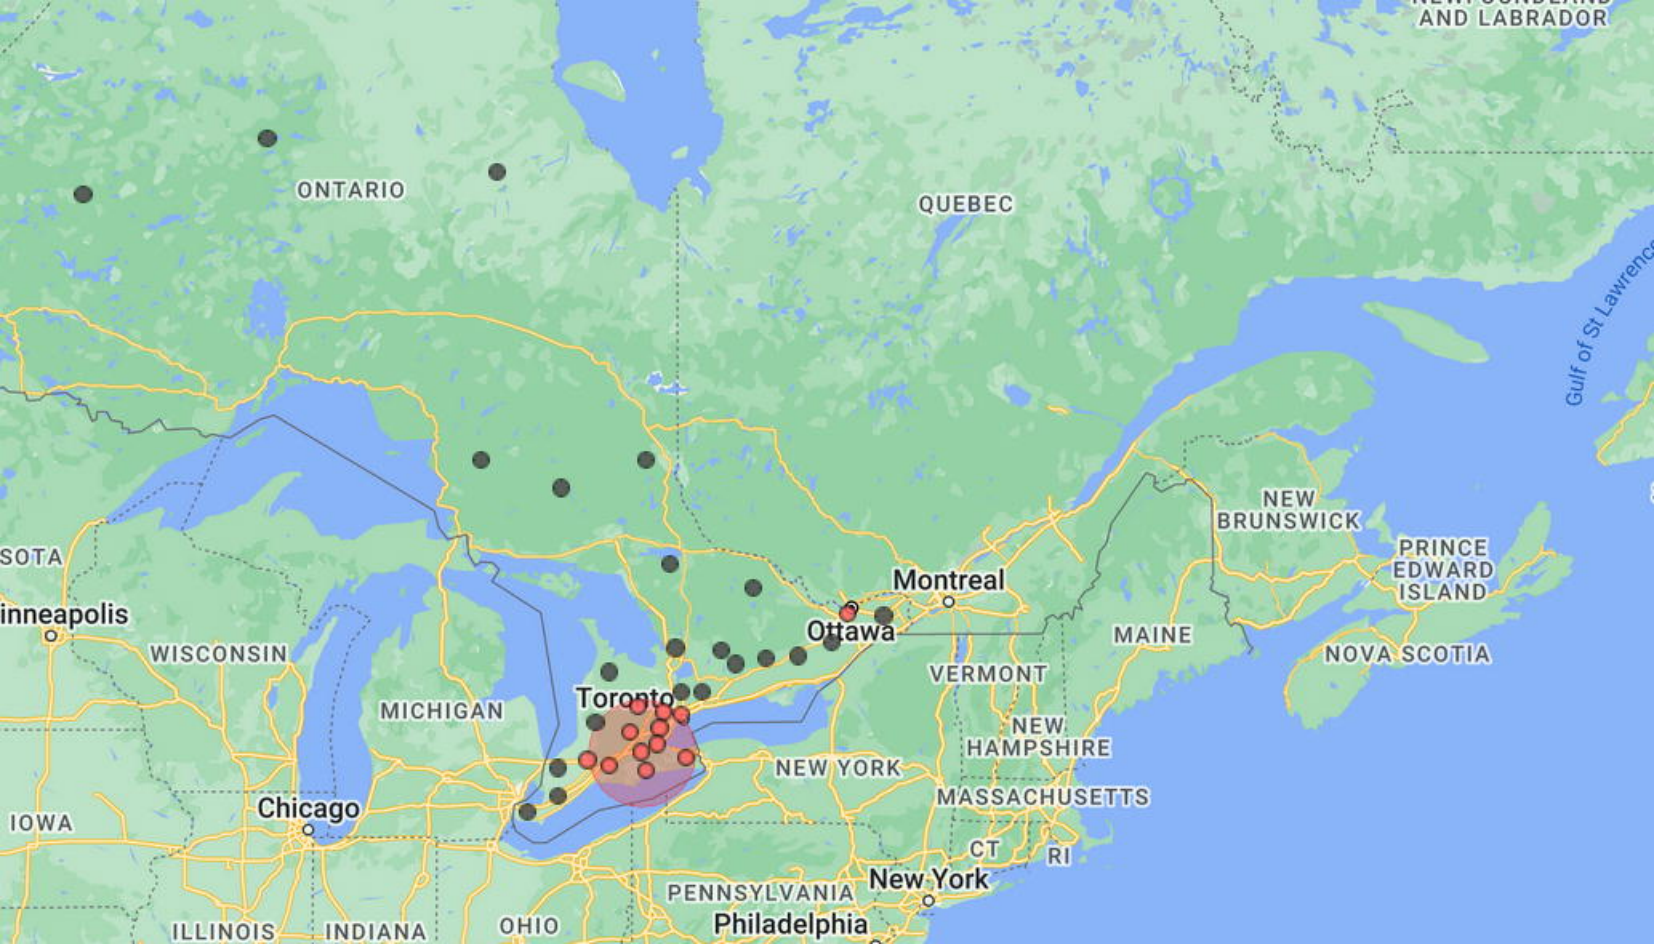

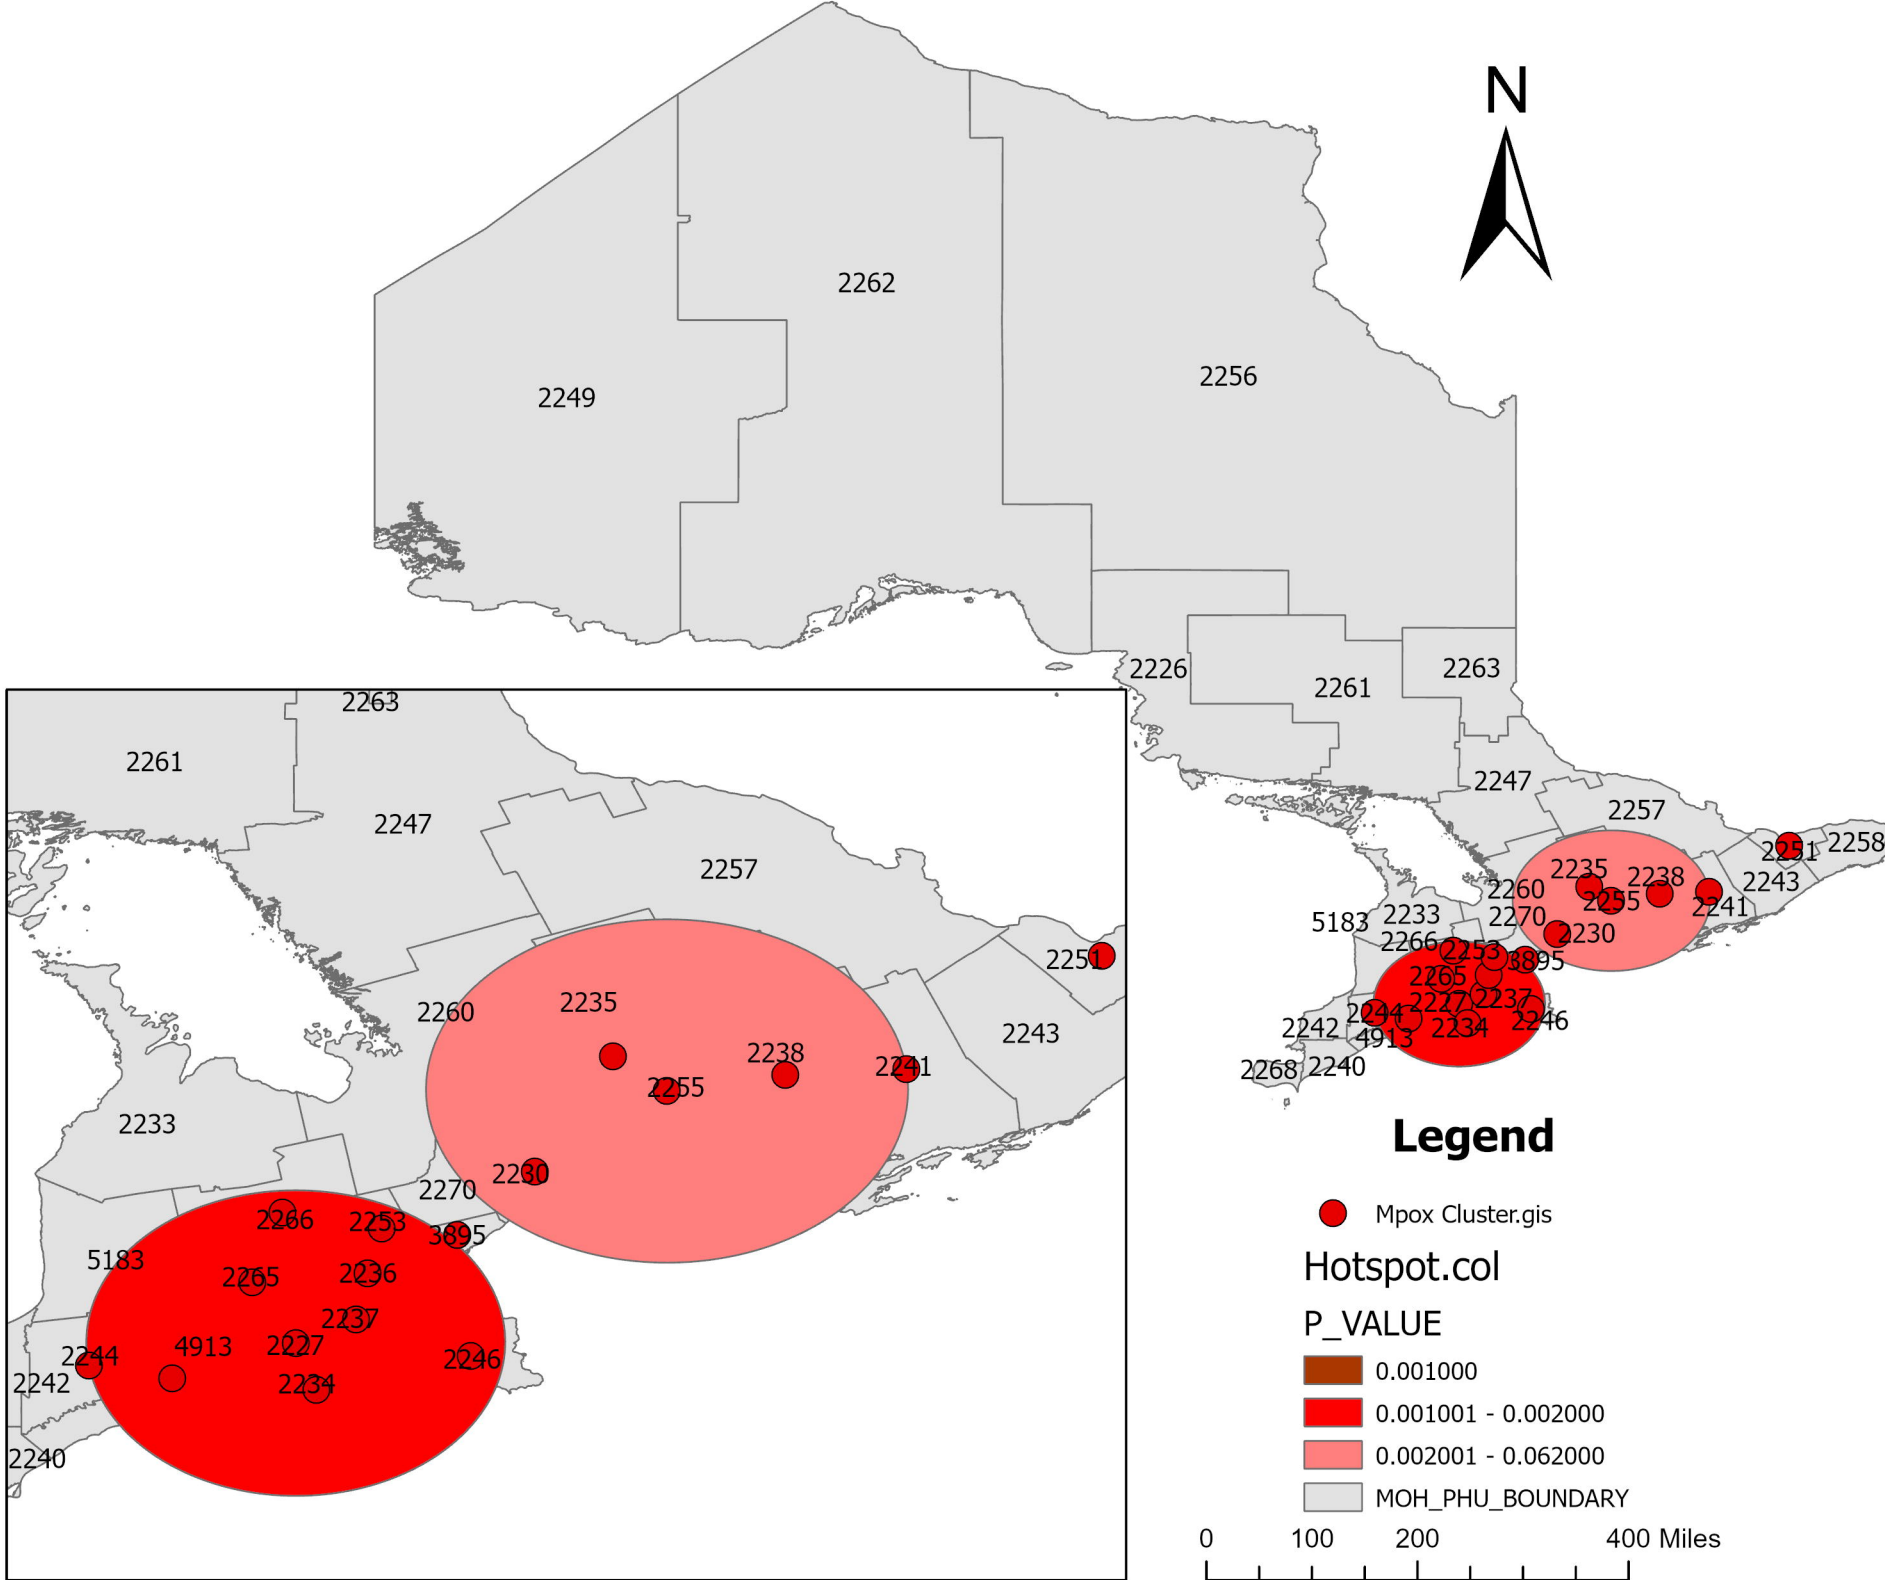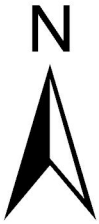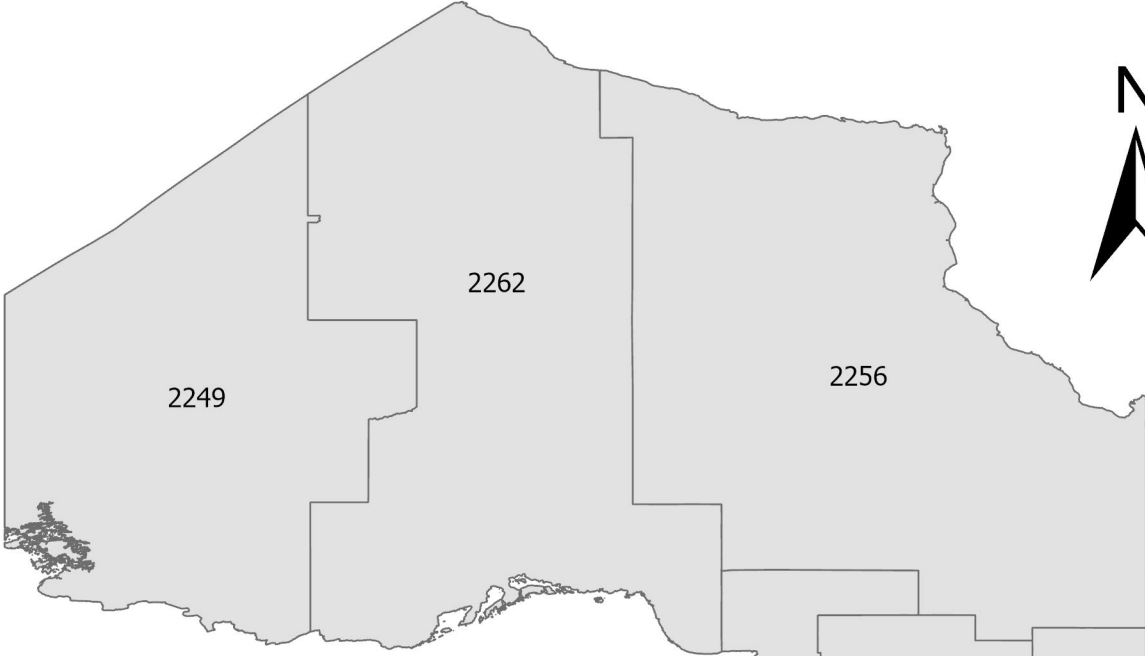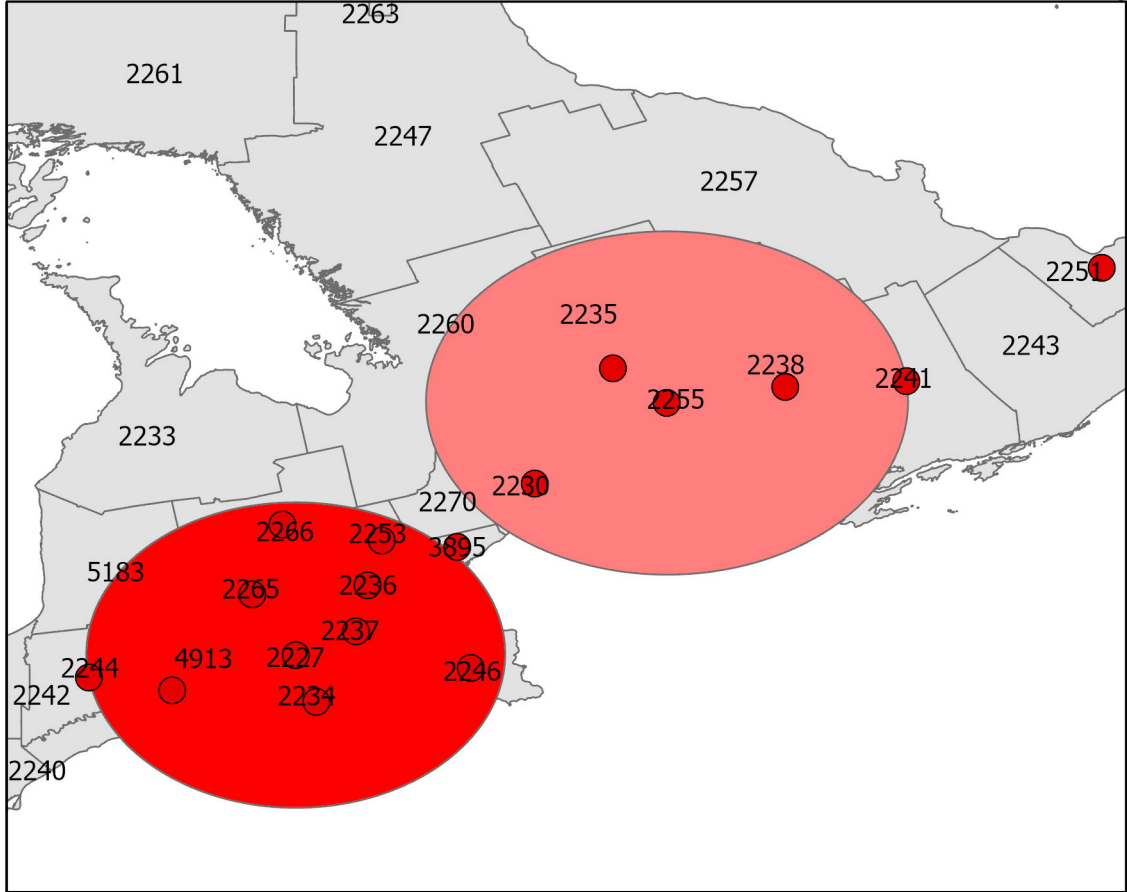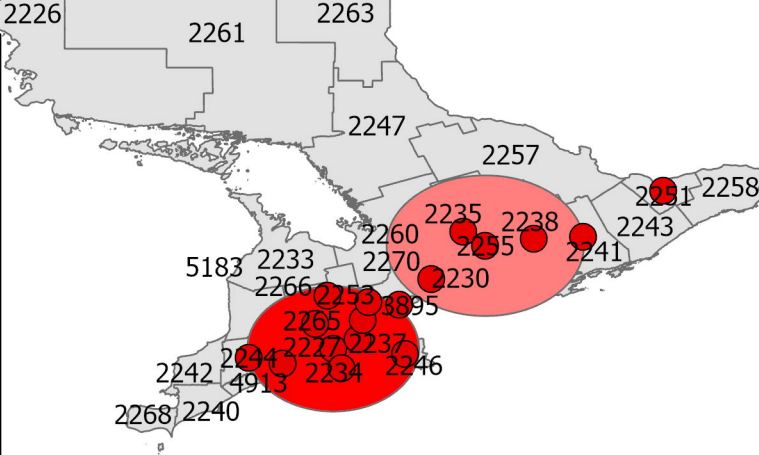



Distribution of Mpox.

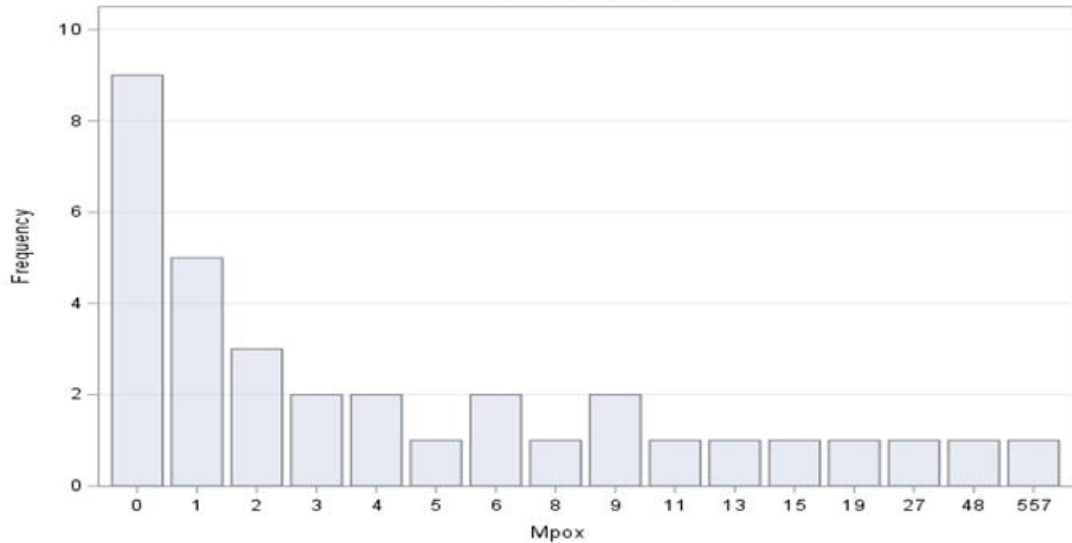

**Contour Fit Plot for Mpox\_(a)**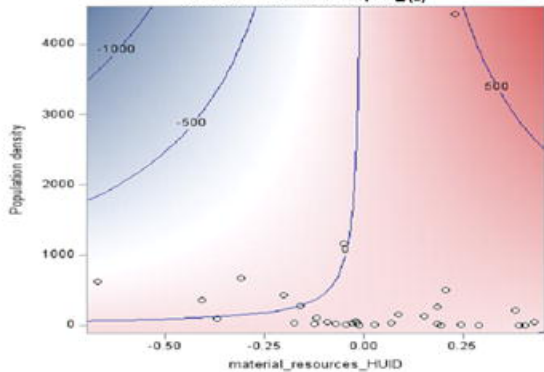**Contour Fit Plot for Mpox\_(b)**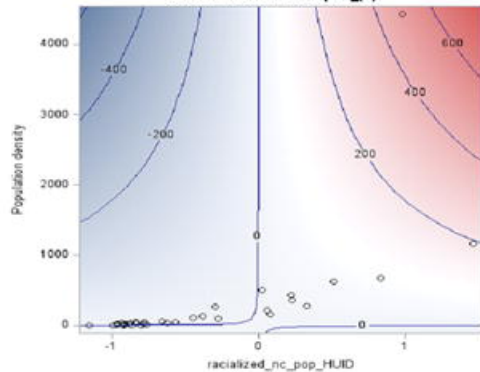**Contour Fit Plot for Mpox\_(c)**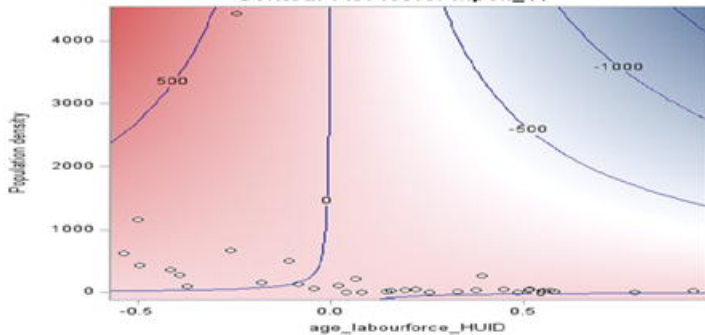

Source: https://medrxiv.org/content/10.1101/2024.06.24.24309430v2.full.pdf
